# Supplementary material for: Synthesis of unsymmetrical disulfides via PPh3-mediated reductive coupling of thiophenols with sulfonyl chlorides
Source: Royal Society of Chemistry journal article supplement (doi:10.1039/d0ob00804d), 2020-01-01
Supplement: d0ob00804d1.pdf [file d0ob00804d1.pdf]

Supporting Information

**Synthesis of unsymmetrical disulfides *via* PPh<sub>3</sub>-mediated reductive coupling of thiophenols with sulfonyl chlorides**

Dungai Wang<sup>a</sup>, Xiao Liang<sup>a</sup>, Mingteng Xiong<sup>a</sup>, Heping Zhu<sup>a</sup>, Yifeng Zhou<sup>b\*</sup> and Yuanjiang Pan<sup>a\*</sup>

<sup>a</sup> Department of Chemistry, Zhejiang University, Hangzhou 310027, China

<sup>b</sup> College of Life Sciences, China Jiliang University, Hangzhou, 310018, China

Email: [panyuanjiang@zju.edu.cn](mailto:panyuanjiang@zju.edu.cn); [zhouyifeng@cjlu.edu.cn](mailto:zhouyifeng@cjlu.edu.cn).

|                                        |     |
|----------------------------------------|-----|
| 1. General Information.....            | S2  |
| 2. General procedure .....             | S2  |
| 3. Control Experiments d and e.....    | S3  |
| 4. X-ray of compound 3t .....          | S5  |
| 5. Spectra Data.....                   | S6  |
| 6. Reference.....                      | S13 |
| 7. NMR Spectra for the Compounds ..... | S14 |

## 1. General Information

All the solvents and reagents were available from commercial sources and used without purification unless stated otherwise.  $^1\text{H}$  and  $^{13}\text{C}$  NMR spectra were gathered on Bruker Avance 400 MHz NMR spectrometers using  $\text{CDCl}_3$  or  $\text{DMSO-}d_6$ . Chemical shifts are reported in parts per million (ppm). Reference peaks for  $\text{CDCl}_3$  in  $^1\text{H}$  NMR and  $^{13}\text{C}$  NMR spectra were set at 7.26 and 77.0 ppm. For  $\text{DMSO-}d_6$ , the reference peaks were set as follows:  $^1\text{H}$  NMR: DMSO at 2.50 ppm;  $^{13}\text{C}$  NMR: DMSO at 40.0 ppm. Data are presented as follows: chemical shift, multiplicity (s = singlet, d = doublet, t = triplet, q = quartet, m = multiplet), coupling constants in Hertz (Hz), integration. High-resolution mass spectras (HRMS) were obtained on Waters GCT premier of EI. X-ray was obtained on Gemini A Ultra with Atlas CCD.

## 2. General procedure

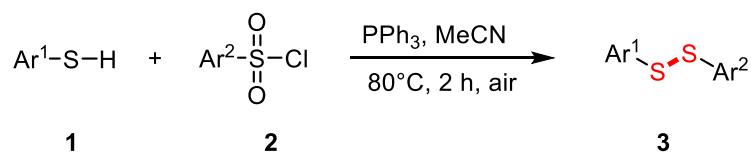

Add  $\text{PPh}_3$  (3 mmol, 6 equiv) to the solution of aryl thiol **1** (0.5 mmol, 1 equiv) and aryl sulfonyl chloride **2** (1.5 mmol, 3 equiv) in MeCN (2.0 mL). The reaction was stirred at  $80^\circ\text{C}$  for 2 h. After the reaction is completed, remove the solvent and purified by column chromatography (DCM/hexane = 1/20 – 1/10) to offer the product **3**.

### 3. Control Experiments d and e

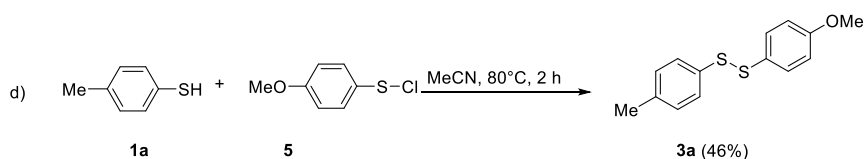

Under an atmosphere of N<sub>2</sub>, *N*-chlorosuccinimide (1.46 g, 11 mmol) was placed in a 50-mL reaction flask and dissolved in dichloromethane (25 mL). 4-methoxybenzenethiol (1.2 mL, 10.0 mmol) was added slowly at 0 °C and the reaction mixture was stirred at 0 °C for 15 min. After the solvent was removed, hexane (15 mL) was added to the residue. The resulting white precipitate of succinimide was filtrated. The hexane was removed by distillation under reduced pressure to obtain the crude material **5** for the experiment d without further purification.<sup>1</sup>

In order to confirm the credibility of the results of experiment f, we conducted following experiments using commercial materials phenylsulfenylchloride.

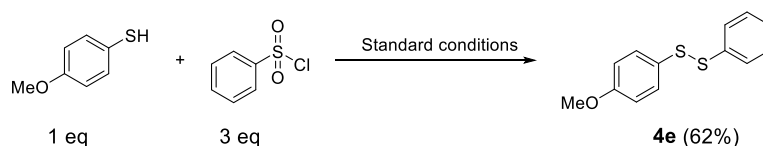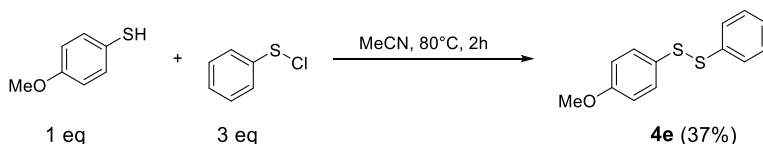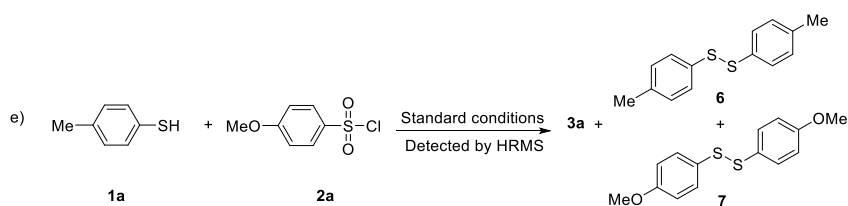

Tolerance = 1.0 mDa / DBE: min = -1.5, max = 50.0  
Element prediction: Off

Monoisotopic Mass, Odd and Even Electron Ions  
10 formula(e) evaluated with 1 results within limits (up to 70 best isotopic matches for each mass)

Elements Used:  
C: 0-100 H: 0-200 S: 0-2  
WDG1064 737 (4.884)  
TOF MS EI+

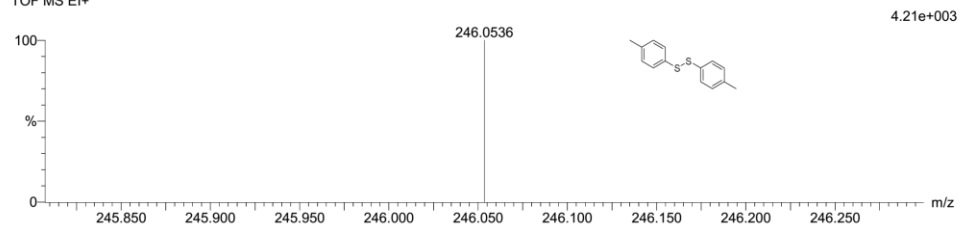

|          |            |      |      |      |           |            |
|----------|------------|------|------|------|-----------|------------|
| Minimum: |            |      |      | -1.5 |           |            |
| Maximum: | 1.0        | 10.0 |      | 50.0 |           |            |
| Mass     | Calc. Mass | mDa  | PPM  | DBE  | i-FIT     | Formula    |
| 246.0536 | 246.0537   | -0.1 | -0.4 | 8.0  | 5548111.0 | C14 H14 S2 |

Tolerance = 1.0 mDa / DBE: min = -1.5, max = 50.0  
Element prediction: Off

Monoisotopic Mass, Odd and Even Electron Ions  
43 formula(e) evaluated with 1 results within limits (up to 70 best isotopic matches for each mass)

Elements Used:  
C: 0-100 H: 0-200 O: 0-3 S: 0-2  
WDG1064 888 (5.689)  
TOF MS EI+

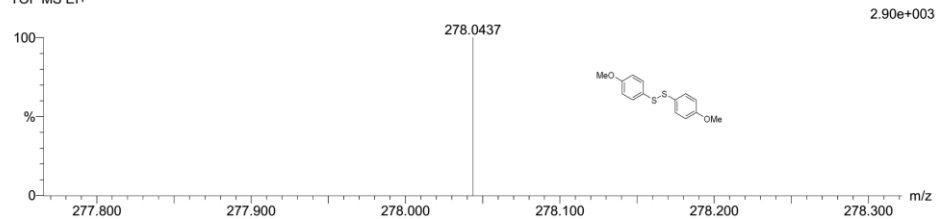

|          |            |      |     |      |           |               |
|----------|------------|------|-----|------|-----------|---------------|
| Minimum: |            |      |     | -1.5 |           |               |
| Maximum: | 1.0        | 10.0 |     | 50.0 |           |               |
| Mass     | Calc. Mass | mDa  | PPM | DBE  | i-FIT     | Formula       |
| 278.0437 | 278.0435   | 0.2  | 0.7 | 8.0  | 5547455.5 | C14 H14 O2 S2 |

#### 4. X-ray of compound 3t

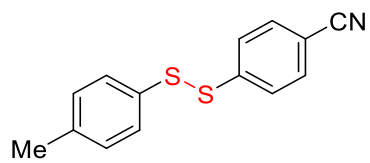

The structure of Compound 3t

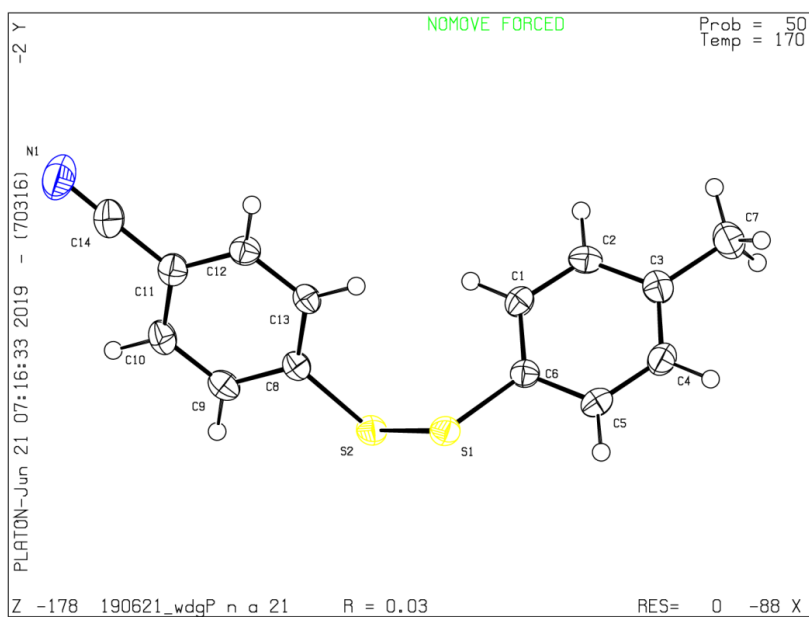

X-ray of compound 3t

CCDC: 1938235

## 5. Spectra Data

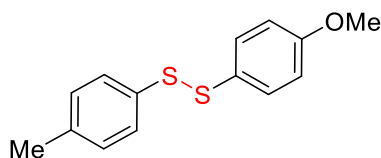

**1-(4-methoxyphenyl)-2-(p-tolyl)disulfane (3a)**<sup>2</sup>, Yellow oil. 97 mg, 74%. <sup>1</sup>H NMR (400 MHz, CDCl<sub>3</sub>) δ 7.43 – 7.38 (m, 4H), 7.12 (d, *J* = 8.0 Hz, 2H), 6.83 (d, *J* = 8.0 Hz, 2H), 3.79 (s, 3H), 2.34 (s, 3H). <sup>13</sup>C NMR (100 MHz, CDCl<sub>3</sub>) δ 159.8, 137.6, 134.0, 131.9, 129.8, 129.2, 128.3, 114.6, 55.3, 21.1. HRMS (EI) *m/z* calcd for C<sub>14</sub>H<sub>14</sub>OS<sub>2</sub><sup>+</sup> 262.0486 [M<sup>+</sup>], found 262.0484.

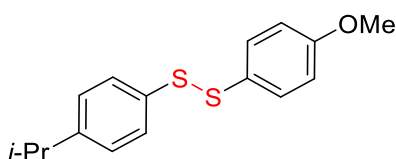

**1-(4-isopropylphenyl)-2-(4-methoxyphenyl)disulfane (3b)**, Yellow oil. 91 mg, 63%. <sup>1</sup>H NMR (400 MHz, CDCl<sub>3</sub>) δ 7.45 – 7.39 (m, 4H), 7.17 (d, *J* = 8.0 Hz, 2H), 6.84 (d, *J* = 8.0 Hz, 2H), 3.80 (d, *J* = 4.0 Hz, 3H), 2.93 – 2.85 (m, 1H), 1.24 (d, *J* = 2.4 Hz, 3H), 1.22 (d, *J* = 2.4 Hz, 3H). <sup>13</sup>C NMR (100 MHz, CDCl<sub>3</sub>) δ 159.9 159.7, 148.5 148.3, 134.4 134.2, 132.6 131.7, 128.9 128.2, 128.4 128.3, 127.2 127.2, 114.6 114.6, 55.4, 33.7 33.7, 23.9. HRMS (EI) *m/z* calcd for C<sub>16</sub>H<sub>18</sub>OS<sub>2</sub><sup>+</sup> 290.0799 [M<sup>+</sup>], found 290.0798.

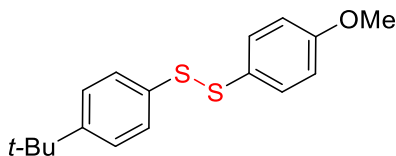

**1-(4-(tert-butyl)phenyl)-2-(4-methoxyphenyl)disulfane (3c)**, Yellow oil. 104 mg, 68%. <sup>1</sup>H NMR (400 MHz, CDCl<sub>3</sub>) δ 7.46 – 7.42 (m, 4H), 7.34 (d, *J* = 12.0 Hz, 2H), 6.85 (d, *J* = 8.0 Hz, 2H), 3.80 (s, 3H), 1.31 (s, 9H). <sup>13</sup>C NMR (100 MHz, CDCl<sub>3</sub>) δ 159.7, 150.7, 134.1, 131.6, 128.5, 128.3, 126.1, 114.6, 55.4, 34.6, 31.3. HRMS (EI) *m/z* calcd for C<sub>17</sub>H<sub>20</sub>OS<sub>2</sub><sup>+</sup> 304.0956 [M<sup>+</sup>], found 304.0954.

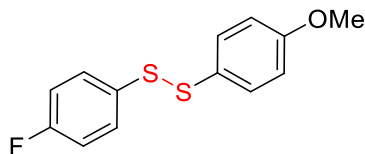

**1-(4-fluorophenyl)-2-(4-methoxyphenyl)disulfane (3d)**, Yellow oil. 93 mg, 70%. <sup>1</sup>H NMR (400 MHz, CDCl<sub>3</sub>) δ 7.48 – 7.44 (m, 4H), 7.41 (d, *J* = 12.0 Hz, 2H), 7.01 (t, *J* = 12.0 Hz, 2H), 6.84 (d, *J* = 8.0 Hz, 2H), 3.80 (s, 3H). <sup>13</sup>C NMR (100 MHz, CDCl<sub>3</sub>) δ 162.5 (d, *J* = 246 Hz), 160.0, 132.7 (d, *J* = 3.0 Hz), 132.4, 131.5 (d, *J* = 8.0 Hz), 127.8, 116.1 (d, *J* = 22.0 Hz), 114.7, 55.3. HRMS (EI) *m/z* calcd for C<sub>13</sub>H<sub>11</sub>FOS<sub>2</sub><sup>+</sup> 266.0235 [M<sup>+</sup>], found 266.0236.

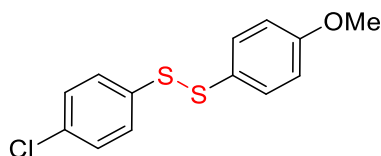

**1-(4-chlorophenyl)-2-(4-methoxyphenyl)disulfane (3e)**<sup>3</sup>, Yellow oil. 99 mg, 70%. <sup>1</sup>H NMR (400 MHz, CDCl<sub>3</sub>) δ 7.44 – 7.38 (m, 4H), 7.28 – 7.25 (m, 2H), 6.83 (d, *J* = 8.0 Hz, 2H), 3.78 (s, 3H). <sup>13</sup>C NMR (100 MHz, CDCl<sub>3</sub>) δ 160.0, 136.0, 133.3, 132.1, 129.8, 129.1, 127.5, 114.8, 55.4. HRMS (EI) *m/z* calcd for C<sub>13</sub>H<sub>11</sub>ClOS<sub>2</sub><sup>+</sup> 281.9940 [M<sup>+</sup>], found 281.9940.

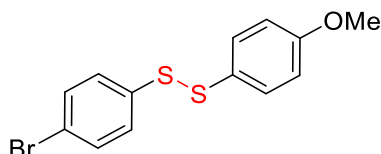

**1-(4-bromophenyl)-2-(4-methoxyphenyl)disulfane (3f)**, Yellow oil. 102 mg, 63%. <sup>1</sup>H NMR (400 MHz, CDCl<sub>3</sub>) δ 7.44 – 7.36 (m, 6H), 6.84 (d, *J* = 12.0 Hz, 2H), 3.79 (s, 3H). <sup>13</sup>C NMR (100 MHz, CDCl<sub>3</sub>) δ 160.0, 136.7, 132.0, 132.0, 129.8, 127.4, 121.2, 114.7, 55.3. HRMS (EI) *m/z* calcd for C<sub>13</sub>H<sub>11</sub>BrOS<sub>2</sub><sup>+</sup> 325.9435 [M<sup>+</sup>], found 325.9433.

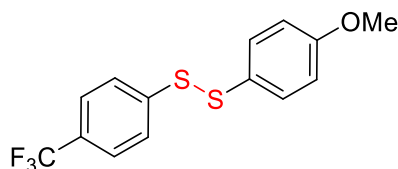

**1-(4-methoxyphenyl)-2-(4-(trifluoromethyl)phenyl)disulfane (3g)**<sup>4</sup>, Yellow oil. 100 mg, 63%. <sup>1</sup>H NMR (400 MHz, CDCl<sub>3</sub>) δ 7.63 (d, *J* = 8.0 Hz, 2H), 7.56 (d, *J* = 8.0 Hz, 2H), 7.43 (d, *J* = 8.0 Hz, 2H), 6.85 (d, *J* = 12.0 Hz, 2H), 3.79 (s, 3H). <sup>13</sup>C NMR (100 MHz, CDCl<sub>3</sub>) δ 160.1, 142.3, 131.8, 128.9 (d, *J* = 32.0 Hz), 127.0, 126.9, 125.8 (q, *J* = 4.0 Hz), 124.0 (q, *J* = 270.0 Hz), 114.9, 55.4. HRMS (EI) *m/z* calcd for C<sub>14</sub>H<sub>11</sub>F<sub>3</sub>OS<sub>2</sub><sup>+</sup> 316.0203 [M<sup>+</sup>], found 316.0202.

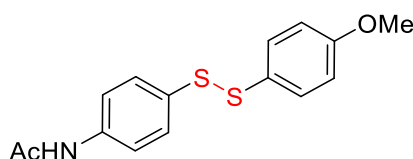

**N-(4-((4-methoxyphenyl)disulfanyl)phenyl)acetamide (3h)**, Yellow oil. 91 mg, 62%. <sup>1</sup>H NMR (400 MHz, DMSO-*d*<sub>6</sub>) δ 10.08 (s, 1H), 7.59 (d, *J* = 8.0 Hz, 2H), 7.42 (d, *J* = 8.0 Hz, 4H), 6.94 (d, *J* = 8.0 Hz, 2H), 3.74 (s, 3H), 2.04 (s, 3H). <sup>13</sup>C NMR (100 MHz, DMSO-*d*<sub>6</sub>) δ 168.5, 159.7, 139.4, 132.1, 130.1, 129.5, 126.8, 119.7, 115.0, 55.3, 24.0. HRMS (EI) *m/z* calcd for C<sub>15</sub>H<sub>15</sub>NO<sub>2</sub>S<sub>2</sub><sup>+</sup> 305.0544 [M<sup>+</sup>], found 305.0543.

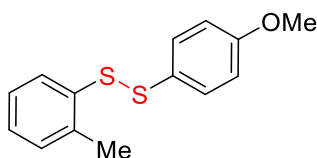

**1-(4-methoxyphenyl)-2-(*o*-tolyl)disulfane (3i)**, Yellow oil. 86 mg, 66%. <sup>1</sup>H NMR (400 MHz, CDCl<sub>3</sub>) δ 7.63 – 7.62 (m, 1H), 7.42 (d, *J* = 8.0 Hz, 2H), 7.18 (d, *J* = 4.0 Hz, 3H), 6.83 (d, *J* = 8.0 Hz, 2H), 3.79 (s, 3H), 2.40 (s, 3H). <sup>13</sup>C NMR (100 MHz, CDCl<sub>3</sub>) δ 159.8,

137.6, 135.9, 132.1, 130.3, 129.2, 127.8, 127.4, 126.6, 114.6, 55.3, 20.1. HRMS (EI)  $m/z$  calcd for  $C_{14}H_{14}OS_2^+$  262.0486 [ $M^+$ ], found 262.0485.

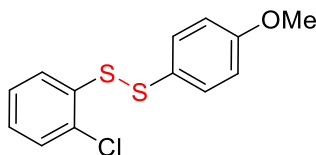

**1-(2-chlorophenyl)-2-(4-methoxyphenyl)disulfane (3j)**, Yellow oil. 86 mg, 61%.  $^1H$  NMR (400 MHz,  $CDCl_3$ )  $\delta$  7.77 (d,  $J = 8.0$  Hz, 1H), 7.44 (d,  $J = 8.0$  Hz, 2H), 7.35 (d,  $J = 12.0$  Hz, 1H), 7.29 – 7.24 (m, 1H), 7.18 – 7.14 (m, 1H), 6.84 (d,  $J = 12.0$  Hz, 2H), 3.78 (s, 3H).  $^{13}C$  NMR (100 MHz,  $CDCl_3$ )  $\delta$  159.8, 135.8, 131.9, 131.5, 129.7, 127.8, 127.6, 127.3, 126.9, 114.8, 55.3. HRMS (EI)  $m/z$  calcd for  $C_{13}H_{11}ClOS_2^+$  281.9940 [ $M^+$ ], found 281.9940.

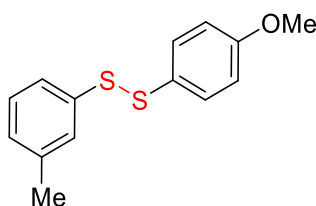

**1-(4-methoxyphenyl)-2-(m-tolyl)disulfane (3k)**, Yellow oil. 90 mg, 69%.  $^1H$  NMR (400 MHz,  $CDCl_3$ )  $\delta$  7.43 (d,  $J = 8.0$  Hz, 2H), 7.32 (d,  $J = 8.0$  Hz, 2H), 7.21 (t,  $J = 8.0$  Hz, 1H), 7.05 (d,  $J = 8.0$  Hz, 1H), 6.84 (d,  $J = 8.0$  Hz, 2H), 3.79 (s, 3H), 2.34 (s, 3H).  $^{13}C$  NMR (100 MHz,  $CDCl_3$ )  $\delta$  159.7, 138.8, 137.2, 131.7, 128.8, 128.7, 128.1, 128.1, 125.2, 114.6, 55.3, 21.4. HRMS (EI)  $m/z$  calcd for  $C_{14}H_{14}OS_2^+$  262.0486 [ $M^+$ ], found 262.0486.

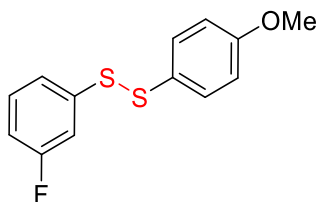

**1-(3-fluorophenyl)-2-(4-methoxyphenyl)disulfane (3l)**, Yellow oil. 85 mg, 64%.  $^1H$  NMR (400 MHz,  $CDCl_3$ )  $\delta$  7.43 (d,  $J = 8.0$  Hz, 2H), 7.30 – 7.25 (m, 3H), 6.94 – 6.90 (m, 1H), 6.84 (d,  $J = 8.0$  Hz, 2H), 3.79 (s, 3H).  $^{13}C$  NMR (100 MHz,  $CDCl_3$ )  $\delta$  163.0 (d,  $J = 247.0$  Hz), 160.0, 139.9 (d,  $J = 7.0$  Hz), 131.9, 130.3 (d,  $J = 8.0$  Hz), 127.4, 123.1 (d,  $J = 3.0$  Hz), 114.8, 114.4 (d,  $J = 24.0$  Hz), 114.0 (d,  $J = 21.0$  Hz), 55.4. HRMS (EI)  $m/z$  calcd for  $C_{13}H_{11}FOS_2^+$  266.0235 [ $M^+$ ], found 266.0236.

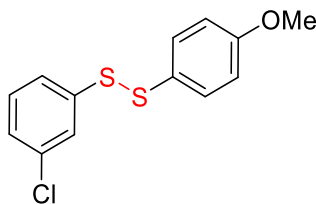

**1-(3-chlorophenyl)-2-(4-methoxyphenyl)disulfane (3m)**, Yellow oil. 94 mg, 67%.  $^1H$  NMR (400 MHz,  $CDCl_3$ )  $\delta$  7.53 (s, 1H), 7.43 (d,  $J = 8.0$  Hz, 2H), 7.38 (d,  $J = 8.0$  Hz,



1H), 7.26 – 7.18 (m, 2H), 6.85 (d,  $J = 12.0$  Hz, 2H), 3.79 (s, 3H).  $^{13}\text{C}$  NMR (101 MHz,  $\text{CDCl}_3$ )  $\delta$  160.0, 139.5, 134.9, 132.0, 130.0, 127.4, 127.3, 127.2, 125.7, 114.8, 55.3. HRMS (EI)  $m/z$  calcd for  $\text{C}_{13}\text{H}_{11}\text{ClOS}_2^+$  281.9940 [ $\text{M}^+$ ], found 281.9942.

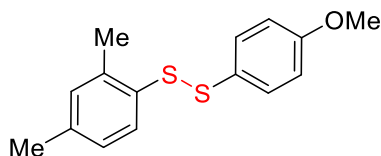

**1-(2,4-dimethylphenyl)-2-(4-methoxyphenyl)disulfane (3n)**, Yellow oil. 92 mg, 67%.  $^1\text{H}$  NMR (400 MHz,  $\text{CDCl}_3$ )  $\delta$  7.46 – 7.40 (m, 3H), 7.02 – 6.96 (m, 2H), 6.83 (d,  $J = 8.0$  Hz, 2H), 3.80 (s, 3H), 2.37 (s, 3H), 2.31 (s, 3H).  $^{13}\text{C}$  NMR (100 MHz,  $\text{CDCl}_3$ )  $\delta$  159.8, 138.3, 138.0, 132.5, 132.4, 131.3, 130.7, 128.1, 127.3, 114.5, 55.3, 21.0, 20.2. HRMS (EI)  $m/z$  calcd for  $\text{C}_{15}\text{H}_{16}\text{OS}_2^+$  276.0643 [ $\text{M}^+$ ], found 276.0644.

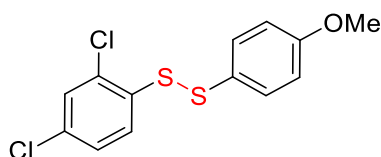

**1-(2,4-dichlorophenyl)-2-(4-methoxyphenyl)disulfane (3o)**, Yellow oil. 106 mg, 67%.  $^1\text{H}$  NMR (400 MHz,  $\text{CDCl}_3$ )  $\delta$  7.67 (d,  $J = 8.0$  Hz, 1H), 7.40 (d,  $J = 8.0$  Hz, 2H), 7.35 (d,  $J = 4.0$  Hz, 1H), 7.25 – 7.21 (m, 1H), 6.82 (d,  $J = 8.0$  Hz, 2H), 3.77 (s, 3H).  $^{13}\text{C}$  NMR (100 MHz,  $\text{CDCl}_3$ )  $\delta$  160.0, 134.6, 133.0, 132.7, 131.8, 129.4, 129.0, 127.6, 126.5, 114.8, 55.4. HRMS (EI)  $m/z$  calcd for  $\text{C}_{13}\text{H}_{10}\text{ClOS}_2^+$  315.9550, [ $\text{M}^+$ ], found 315.9553.

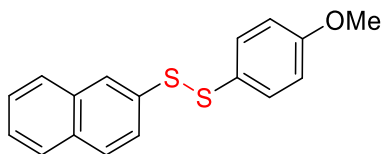

**1-(4-methoxyphenyl)-2-(naphthalen-2-yl)disulfane (3p)**<sup>3</sup>, Yellow oil. 98 mg, 66%.  $^1\text{H}$  NMR (400 MHz,  $\text{CDCl}_3$ )  $\delta$  7.96 (s, 1H), 7.83 – 7.75 (m, 3H), 7.63 (dd,  $J = 8.6, 1.8$  Hz, 1H), 7.50 – 7.44 (m, 4H), 6.82 (d,  $J = 8.0$  Hz, 2H), 3.77 (s, 3H).  $^{13}\text{C}$  NMR (100 MHz,  $\text{CDCl}_3$ )  $\delta$  159.9, 134.7, 133.4, 132.5, 132.0, 128.8, 127.9, 127.7, 127.5, 127.0, 126.7, 126.2, 126.2, 114.7, 55.3. HRMS (EI)  $m/z$  calcd for  $\text{C}_{17}\text{H}_{14}\text{OS}_2^+$  298.0486, [ $\text{M}^+$ ], found 298.0488.

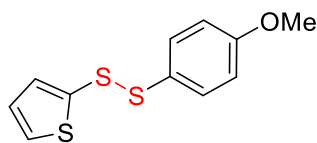

**2-((4-methoxyphenyl)disulfaneyl)thiophene (3q)**, Yellow oil. 89 mg, 70%.  $^1\text{H}$  NMR (400 MHz,  $\text{CDCl}_3$ )  $\delta$  7.46 – 7.42 (m, 3H), 7.10 (dd,  $J = 3.6, 1.2$  Hz, 1H), 6.97 (dd,  $J = 5.3, 3.6$  Hz, 1H), 6.88 (d,  $J = 8.0$  Hz, 2H), 3.83 (s, 3H).  $^{13}\text{C}$  NMR (100 MHz,  $\text{CDCl}_3$ )  $\delta$  160.4, 136.5, 134.5, 134.3, 131.3, 127.9, 127.5, 114.6, 55.3. HRMS (EI)  $m/z$  calcd for  $\text{C}_{11}\text{H}_{10}\text{OS}_3^+$  253.9894, [ $\text{M}^+$ ], found 253.9892.

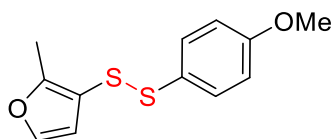

**3-((4-methoxyphenyl)disulfaneyl)-2-methylfuran (3r)**, Yellow oil. 78 mg, 62%. <sup>1</sup>H NMR (400 MHz, CDCl<sub>3</sub>) δ 7.40 (d, *J* = 8.0 Hz, 2H), 7.26 (s, 1H), 6.84 (d, *J* = 8.0 Hz, 2H), 6.35 (d, *J* = 2.0 Hz, 1H), 3.81 (s, 3H), 2.08 (s, 3H). <sup>13</sup>C NMR (100 MHz, CDCl<sub>3</sub>) δ 160.3, 156.5, 140.8, 134.4, 128.1, 114.5, 114.4, 113.1, 55.4, 11.6. HRMS (EI) *m/z* calcd for C<sub>12</sub>H<sub>12</sub>O<sub>2</sub>S<sub>2</sub><sup>+</sup> 252.0279, [M<sup>+</sup>], found 252.0277.

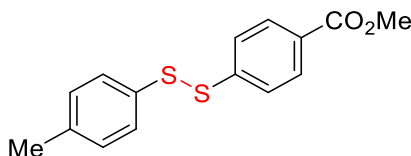

**methyl 4-(p-tolyldisulfaneyl)benzoate (3s)**, Yellow oil. 85 mg, 59%. <sup>1</sup>H NMR (400 MHz, CDCl<sub>3</sub>) δ 7.96 (d, *J* = 8.0 Hz, 2H), 7.57 (d, *J* = 12.0 Hz, 2H), 7.37 (d, *J* = 8.0 Hz, 2H), 7.11 (d, *J* = 8.0 Hz, 2H), 3.90 (s, 3H), 2.32 (s, 3H). <sup>13</sup>C NMR (100 MHz, CDCl<sub>3</sub>) δ 166.5, 143.4, 137.9, 132.7, 130.1, 130.0, 128.5, 128.4, 126.0, 52.1, 21.0. HRMS (EI) *m/z* calcd for C<sub>15</sub>H<sub>14</sub>O<sub>2</sub>S<sub>2</sub><sup>+</sup> 290.0435, [M<sup>+</sup>], found 290.0433.

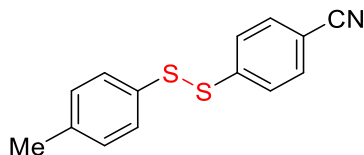

**4-(p-tolyldisulfaneyl)benzonitrile (3t)**, White solid. 103 mg, 80%, mp: 74.7-76.5°C. <sup>1</sup>H NMR (400 MHz, CDCl<sub>3</sub>) δ 7.61 – 7.55 (m, 4H), 7.36 (d, *J* = 8.0 Hz, 2H), 7.13 (d, *J* = 8.0 Hz, 2H), 2.33 (s, 3H). <sup>13</sup>C NMR (100 MHz, CDCl<sub>3</sub>) δ 144.1, 138.3, 132.4, 132.1, 130.1, 128.5, 126.4, 118.5, 109.9, 21.0. HRMS (EI) *m/z* calcd for C<sub>14</sub>H<sub>11</sub>NS<sub>2</sub><sup>+</sup> 257.0333, [M<sup>+</sup>], found 257.0336.

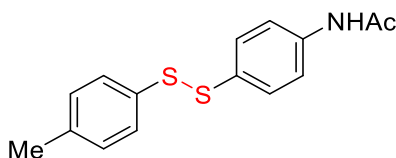

**N-(4-(p-tolyldisulfaneyl)phenyl)acetamide (3u)**, Colorless oil. 65 mg, 50%. <sup>1</sup>H NMR (400 MHz, DMSO-*d*<sub>6</sub>) δ 10.07 (s, 1H), 7.60 – 7.57 (m, 2H), 7.44 – 7.37 (m, 4H), 7.18 (d, *J* = 4.0 Hz, 2H), 2.27 (s, 3H), 2.03 (s, 3H). <sup>13</sup>C NMR (100 MHz, DMSO-*d*<sub>6</sub>) δ 168.5, 139.5, 139.4, 137.6, 137.5, 132.7, 132.6, 130.1, 130.0, 129.8, 129.3, 129.3, 128.5, 128.1, 119.7, 119.7, 24.0, 20.6. HRMS (EI) *m/z* calcd for C<sub>15</sub>H<sub>15</sub>NOS<sub>2</sub><sup>+</sup> 289.0595, [M<sup>+</sup>], found 289.0596.

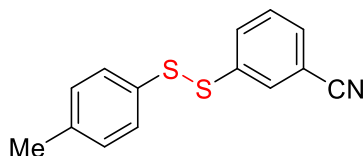

**3-(p-tolyldisulfaneyl)benzonitrile (3v)**, Yellow oil. 87 mg, 68%. <sup>1</sup>H NMR (400 MHz, CDCl<sub>3</sub>) δ 7.78 (t, *J* = 4.0 Hz, 1H), 7.72 – 7.69 (m, 1H), 7.50 – 7.48 (m, 1H), 7.42 – 7.37 (m, 3H), 7.13 (d, *J* = 8.0 Hz, 2H), 2.33 (s, 3H). <sup>13</sup>C NMR (100 MHz, CDCl<sub>3</sub>) δ 139.6, 138.3, 132.2, 131.2, 130.3, 130.1, 129.6, 128.7, 118.2, 113.3, 21.1. HRMS (EI) *m/z* calcd for C<sub>14</sub>H<sub>11</sub>NS<sub>2</sub><sup>+</sup> 257.0333, [M<sup>+</sup>], found 257.0333.

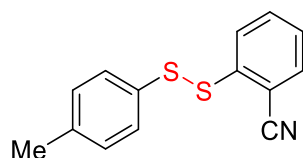

**2-(p-tolyldisulfaneyl)benzonitrile (3w)**, Yellow oil. 104 mg, 81%.  $^1\text{H NMR}$  (400 MHz,  $\text{CDCl}_3$ )  $\delta$  7.81 – 7.78 (m, 1H), 7.61 (dd,  $J = 8.0, 1.0$  Hz, 1H), 7.54 (td,  $J = 8.0, 1.4$  Hz, 1H), 7.38 (d,  $J = 8.0$  Hz, 2H), 7.31 (td,  $J = 8.0, 1.0$  Hz, 1H), 7.13 (d,  $J = 8.0$  Hz, 2H), 2.33 (s, 3H).  $^{13}\text{C NMR}$  (100 MHz,  $\text{CDCl}_3$ )  $\delta$  141.8, 138.4, 135.5, 133.1, 132.0, 130.0, 129.0, 128.4, 127.2, 116.3, 111.9, 21.1. HRMS (EI)  $m/z$  calcd for  $\text{C}_{14}\text{H}_{11}\text{NS}_2^+$  257.0333,  $[\text{M}^+]$ , found 257.0332.

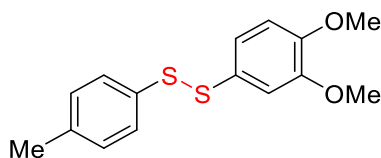

**1-(3,4-dimethoxyphenyl)-2-(p-tolyl)disulfane (3x)**, Yellow oil. 103 mg, 71%.  $^1\text{H NMR}$  (400 MHz,  $\text{CDCl}_3$ )  $\delta$  7.39 (d,  $J = 8.0$  Hz, 2H), 7.12 (d,  $J = 8.0$  Hz, 2H), 7.05 (dd,  $J = 8.4, 2.0$  Hz, 1H), 7.00 (d,  $J = 2.0$  Hz, 1H), 6.78 (d,  $J = 8.0$  Hz, 1H), 3.86 (s, 3H), 3.82 (s, 3H), 2.33 (s, 3H).  $^{13}\text{C NMR}$  (100 MHz,  $\text{CDCl}_3$ )  $\delta$  149.2, 149.1, 137.8, 134.0, 129.8, 129.5, 128.5, 122.8, 113.2, 111.3, 55.9, 55.9, 21.1. HRMS (EI)  $m/z$  calcd for  $\text{C}_{15}\text{H}_{16}\text{O}_2\text{S}_2^+$  292.0592,  $[\text{M}^+]$ , found 292.0589.

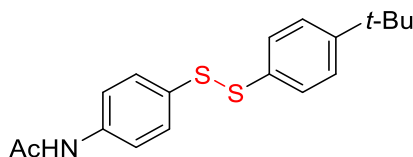

**N-(4-((4-tert-butyl)phenyl)disulfaneyl)phenylacetamide (3y)**, White solid. 76 mg, 46%, mp: 163.7-165.3°C.  $^1\text{H NMR}$  (400 MHz,  $\text{DMSO-}d_6$ )  $\delta$  10.09 (s, 1H), 7.60 (d,  $J = 8.0$  Hz, 2H), 7.46 – 7.37 (m, 6H), 2.04 (s, 3H), 1.23 (s, 10H).  $^{13}\text{C NMR}$  (100 MHz,  $\text{DMSO-}d_6$ )  $\delta$  168.5, 150.5, 139.3, 132.8, 129.4, 129.2, 127.9, 126.3, 119.7, 34.3, 31.0, 24.0. HRMS (EI)  $m/z$  calcd for  $\text{C}_{18}\text{H}_{21}\text{NOS}_2^+$  331.1065,  $[\text{M}^+]$ , found 331.1063.

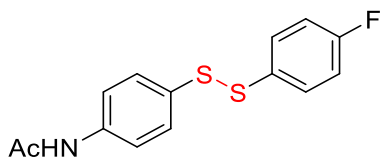

**N-(4-((4-fluorophenyl)disulfaneyl)phenyl)acetamide (3z)**, White solid. 72 mg, 49%, mp: 90.5-92.1°C.  $^1\text{H NMR}$  (400 MHz,  $\text{DMSO-}d_6$ )  $\delta$  10.10 (s, 1H), 7.61 – 7.58 (m, 2H), 7.55 – 7.52 (m, 2H), 7.45 – 7.42 (m, 2H), 7.25 – 7.21 (m, 2H), 2.04 (s, 3H).  $^{13}\text{C NMR}$  (100 MHz,  $\text{DMSO-}d_6$ )  $\delta$  168.5, 161.9 (d,  $J = 244.0$  Hz), 139.6, 131.9 (d,  $J = 3.0$  Hz), 131.0 (d,  $J = 9.0$  Hz), 130.1, 128.9, 119.8, 116.5 (d,  $J = 22.0$  Hz), 24.0. HRMS (EI)  $m/z$  calcd for  $\text{C}_{14}\text{H}_{12}\text{FNOS}_2^+$  293.0344,  $[\text{M}^+]$ , found 293.0343.

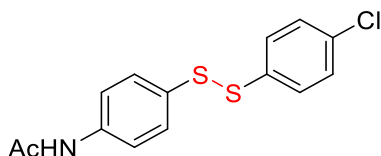

***N*-((4-(4-chlorophenyl)disulfaneyl)phenyl)acetamide (4a)**, White solid. 52 mg, 34%, mp: 116.3-118.0°C. <sup>1</sup>H NMR (400 MHz, DMSO-*d*<sub>6</sub>) δ 10.10 (s, 1H), 7.60 (d, *J* = 8.0 Hz, 2H), 7.54 – 7.51 (m, 2H), 7.46 – 7.43 (m, 4H), 2.03 (s, 3H). <sup>13</sup>C NMR (100 MHz, DMSO-*d*<sub>6</sub>) δ 168.5, 139.7, 135.2, 132.3, 130.0, 129.4, 129.3, 128.6, 119.8, 24.0. HRMS (EI) *m/z* calcd for C<sub>14</sub>H<sub>12</sub>ClNOS<sub>2</sub><sup>+</sup> 309.0049, [M<sup>+</sup>], found 309.0045.

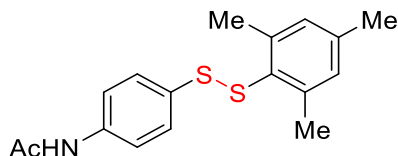

***N*-((4-(mesityldisulfaneyl)phenyl)acetamide (4b)**, White solid. 70 mg, 44%, mp: 150.2-152.1°C. <sup>1</sup>H NMR (400 MHz, DMSO-*d*<sub>6</sub>) δ 10.11 (s, 1H), 7.56 (d, *J* = 8.0 Hz, 2H), 7.32 (d, *J* = 8.0 Hz, 2H), 6.92 (s, 2H), 2.21 (s, 3H), 2.19 (s, 6H), 2.05 (s, 3H). <sup>13</sup>C NMR (100 MHz, DMSO-*d*<sub>6</sub>) δ 168.6, 142.2, 140.3, 139.4, 133.5, 131.1, 129.2, 129.3, 119.2, 24.1, 21.4, 20.7. HRMS (EI) *m/z* calcd for C<sub>17</sub>H<sub>19</sub>NOS<sub>2</sub><sup>+</sup> 317.0908, [M<sup>+</sup>], found 317.0909.

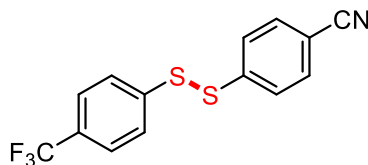

**4-((4-(trifluoromethyl)phenyl)disulfaneyl)benzonitrile (4c)**, White solid. 100 mg, 64%. mp: 65.7-67.3°C. <sup>1</sup>H NMR (400 MHz, CDCl<sub>3</sub>) δ 7.58 (d, *J* = 2.9 Hz, 4H), 7.57 (s, 4H). <sup>13</sup>C NMR (100 MHz, CDCl<sub>3</sub>) δ 142.6, 140.2, 132.7, 129.6 (q, *J* = 32.8 Hz), 126.6, 126.4, 126.2 (q, *J* = 3.8 Hz), 123.7 (q, *J* = 271 Hz), 118.2, 110.6. HRMS (EI) *m/z* calcd for C<sub>14</sub>H<sub>8</sub>F<sub>3</sub>NS<sub>2</sub><sup>+</sup> 311.0050, [M<sup>+</sup>], found 311.0049.

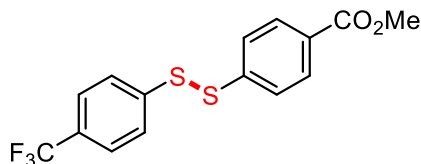

**methyl 4-((4-(trifluoromethyl)phenyl)disulfaneyl)benzoate (4d)**, White solid. 104 mg, 60%. mp: 77.3-79.2°C. <sup>1</sup>H NMR (400 MHz, CDCl<sub>3</sub>) δ 7.98 (d, *J* = 8.6 Hz, 2H), 7.67–7.43 (m, 6H), 3.90 (s, 3H). <sup>13</sup>C NMR (100 MHz, CDCl<sub>3</sub>) δ 166.3, 141.9, 140.9, 130.3, 129.3 (d, *J* = 32.8 Hz), 128.9, 126.5, 126.03 (q, *J* = 3.8 Hz), 125.9, 123.8 (q, *J* = 270 Hz), 52.2. HRMS (EI) *m/z* calcd for C<sub>15</sub>H<sub>11</sub>F<sub>3</sub>O<sub>2</sub>S<sub>2</sub><sup>+</sup> 344.0153, [M<sup>+</sup>], found 344.0155.

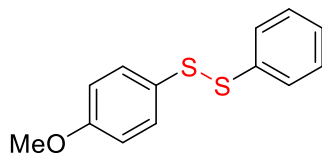

**1-(4-methoxyphenyl)-2-phenyldisulfane (4e)**<sup>5</sup>, Yellow oil. 77 mg, 62%. <sup>1</sup>H NMR (400 MHz, CDCl<sub>3</sub>) δ 7.51-7.37 (m, 2H), 7.43-7.40 (m, 2H), 7.32-7.28 (m, 2H), 7.24-7.20 (m, 1H), 6.83-6.81 (m, 2H). <sup>13</sup>C NMR (100 MHz, CDCl<sub>3</sub>) δ 159.8, 137.4, 131.7, 129.0, 128.2, 128.0, 127.2, 114.7, 55.3.

## 6. Reference

1. Iwasaki, M.; Fujii, T.; Yamamoto, A.; Nakajima, K.; Nishihara, Y. *Chem. Asian J.* **2014**, *9*, 58.
2. Taniguchi, N. *Tetrahedron.* **2017**, *73*, 2030.
3. Dethe, D. H.; Srivastava, A.; Dherange, B. D.; Kumar, B. V. *Adv. Synth. Catal.* **2018**, *360*, 3020.
4. Xiao, X.; Feng, M.; Jiang, X. *Chem. Commun.* **2015**, *51*, 4208.
5. Ruan, H.; Meng, L -G.; Zhu, L.; Wang, L. *Adv. Synth. Catal.* **2019**, *361*, 3217.

## 7. NMR Spectra for the Compounds

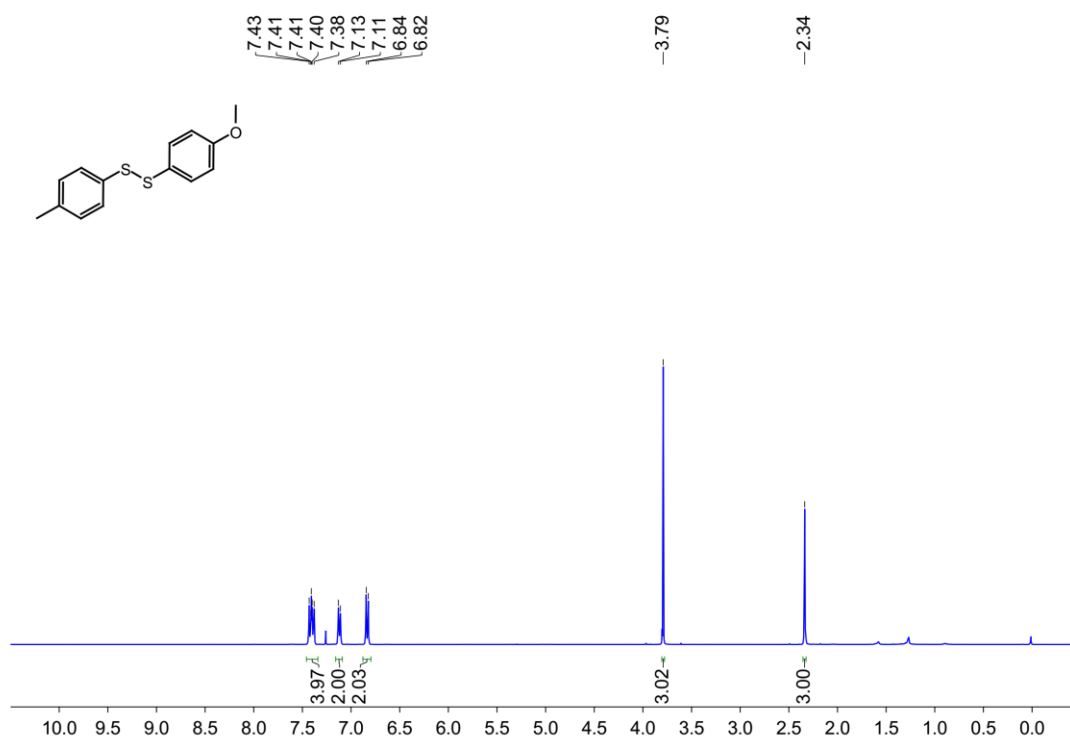

<sup>1</sup>H NMR spectrum of compound 3a

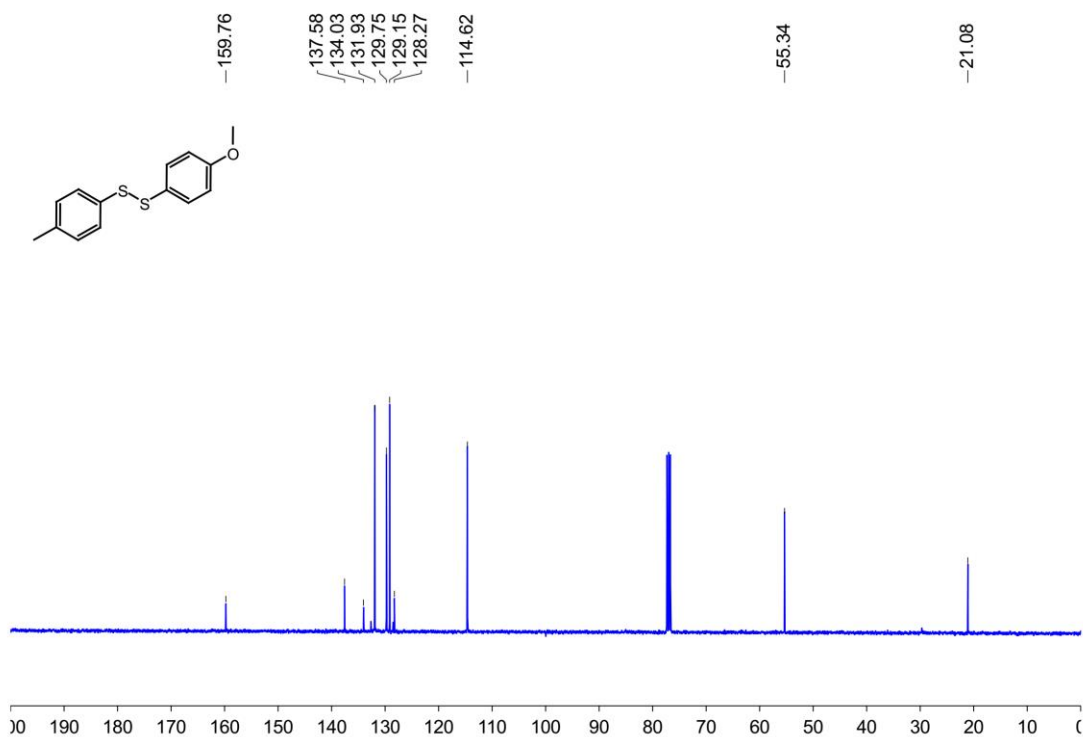

<sup>13</sup>C NMR spectrum of compound 3a

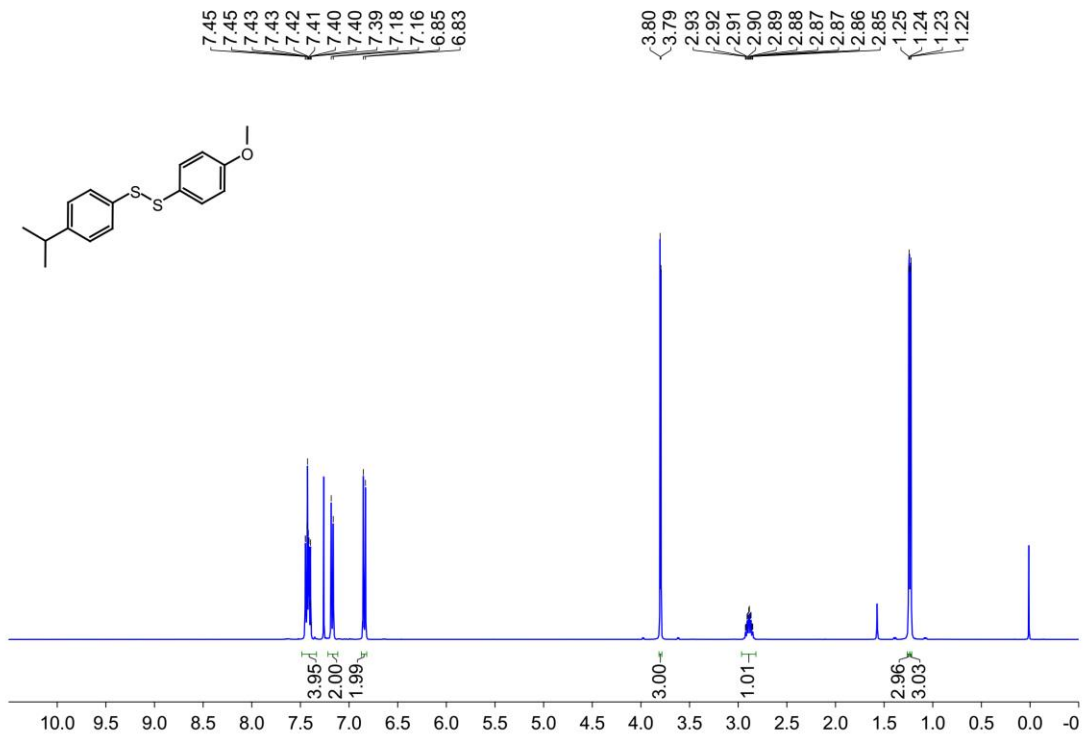

<sup>1</sup>H NMR spectrum of compound **3b**

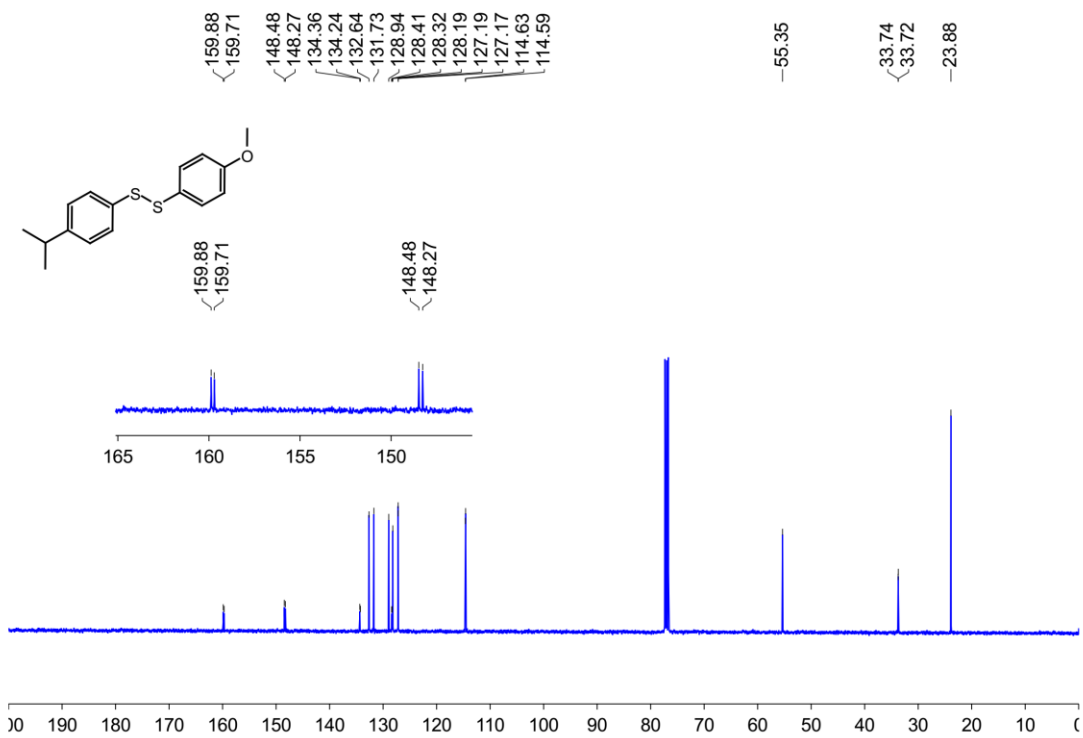

<sup>13</sup>C NMR spectrum of compound **3b**

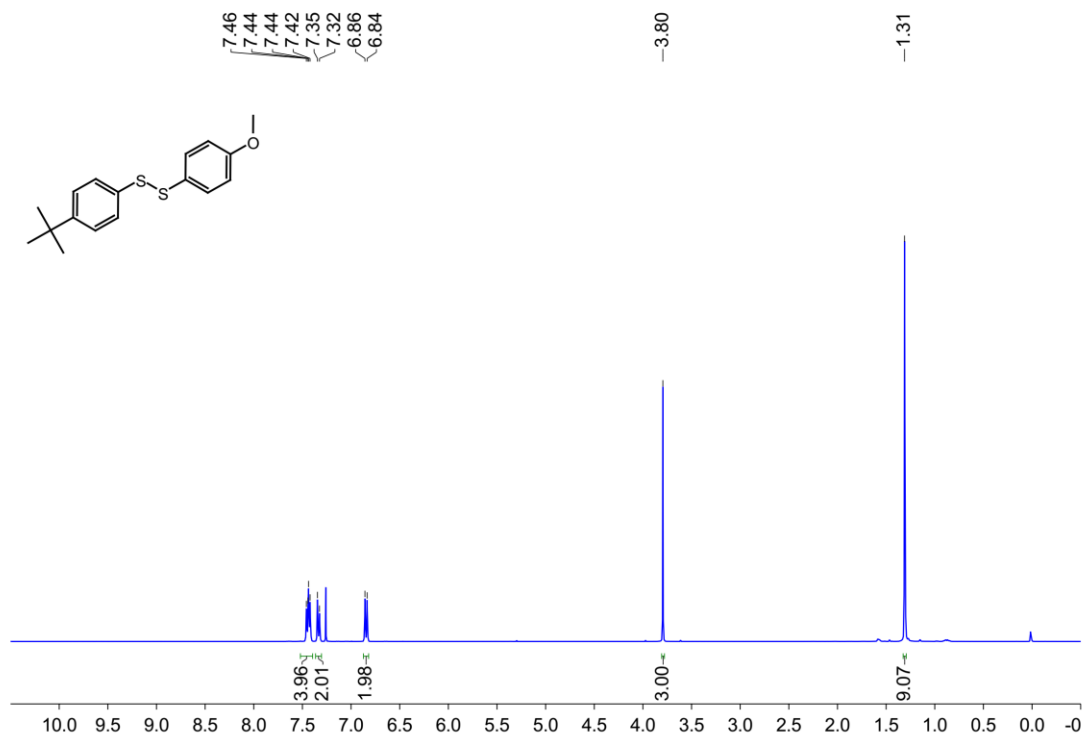

$^1\text{H}$  NMR spectrum of compound **3c**

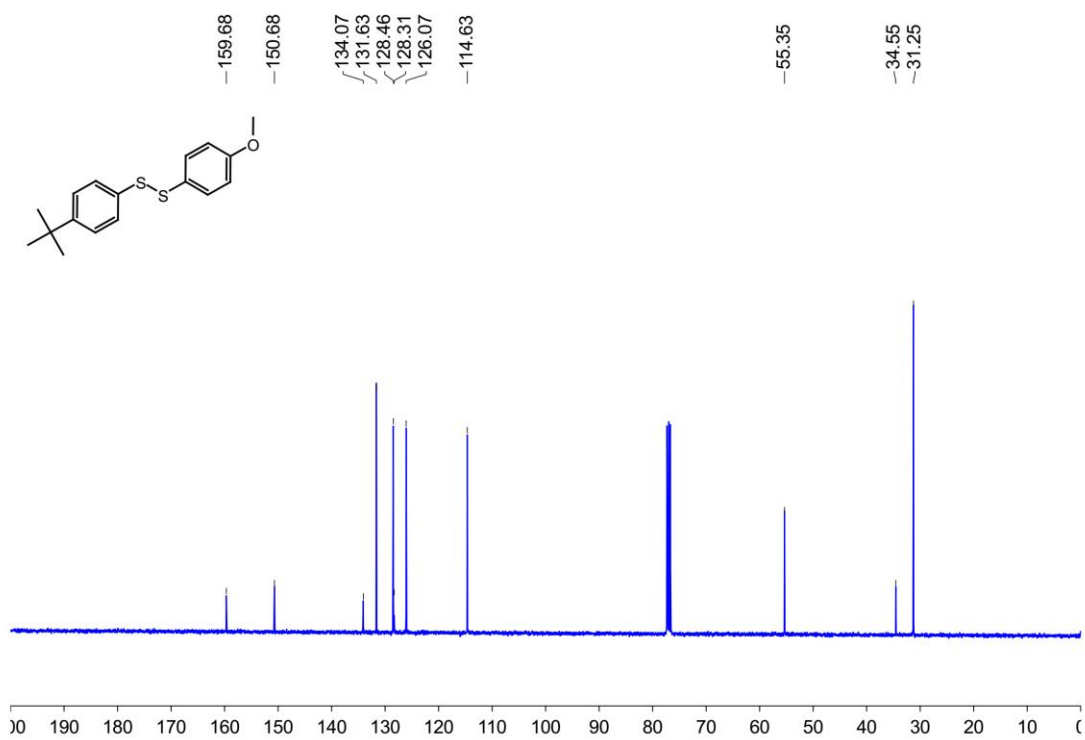

$^{13}\text{C}$  NMR spectrum of compound **3c**



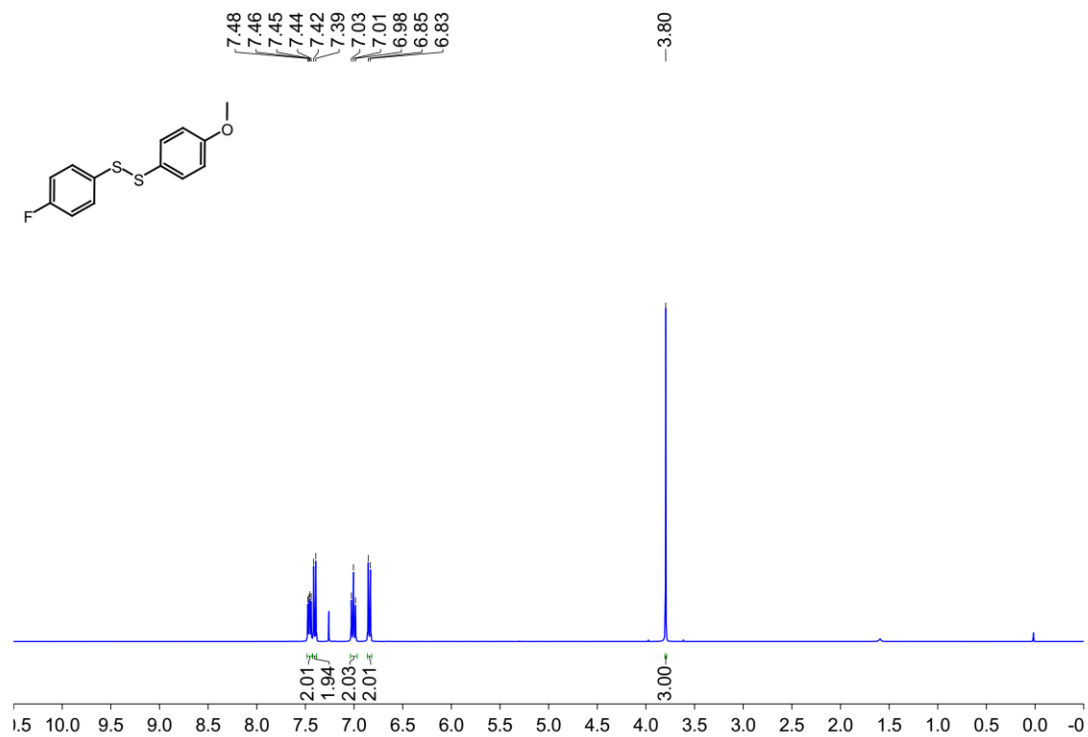

$^1\text{H}$  NMR spectrum of compound **3d**

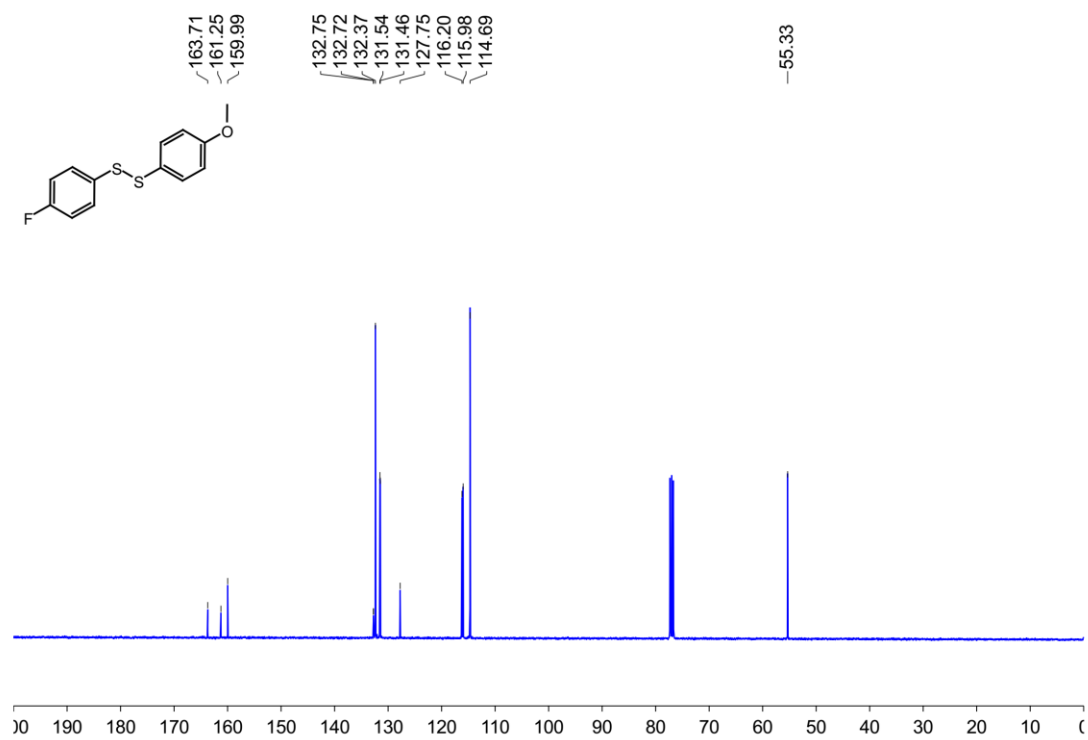

$^{13}\text{C}$  NMR spectrum of compound **3d**

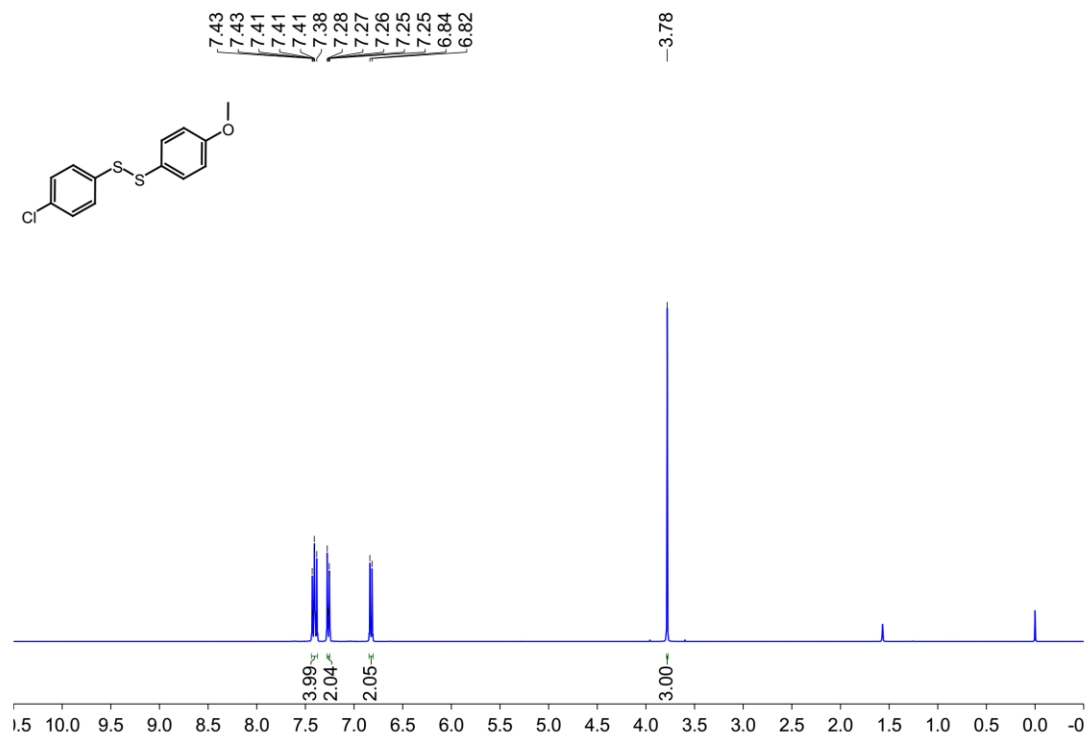

$^1\text{H}$  NMR spectrum of compound **3e**

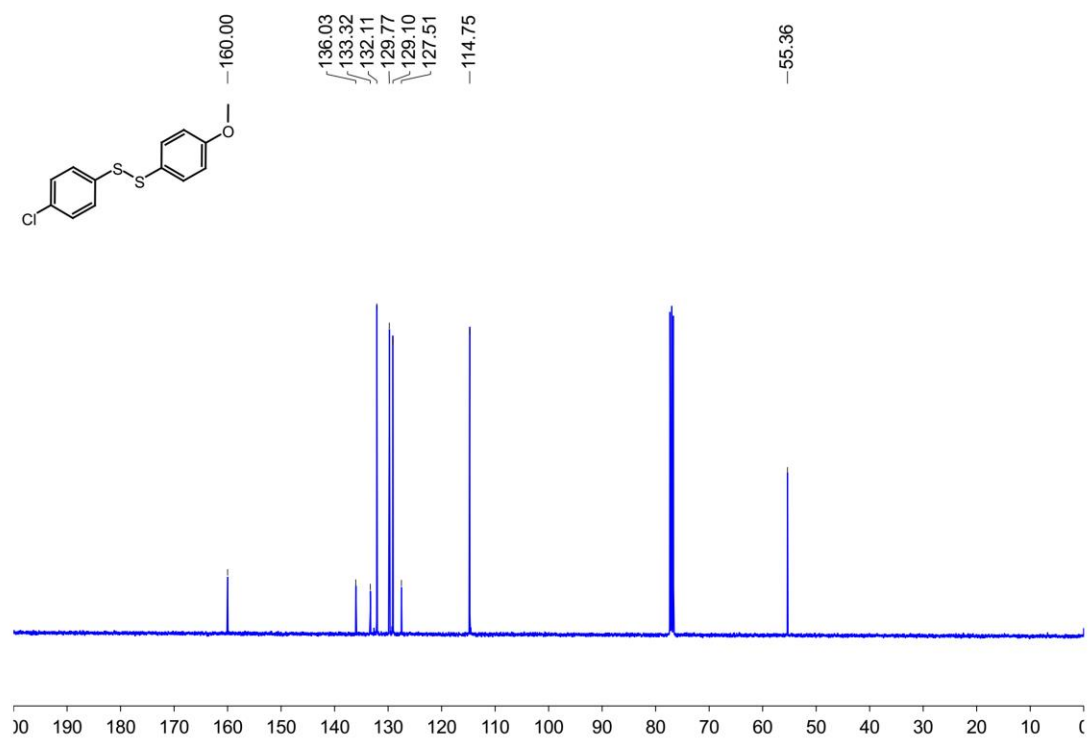

$^{13}\text{C}$  NMR spectrum of compound **3e**

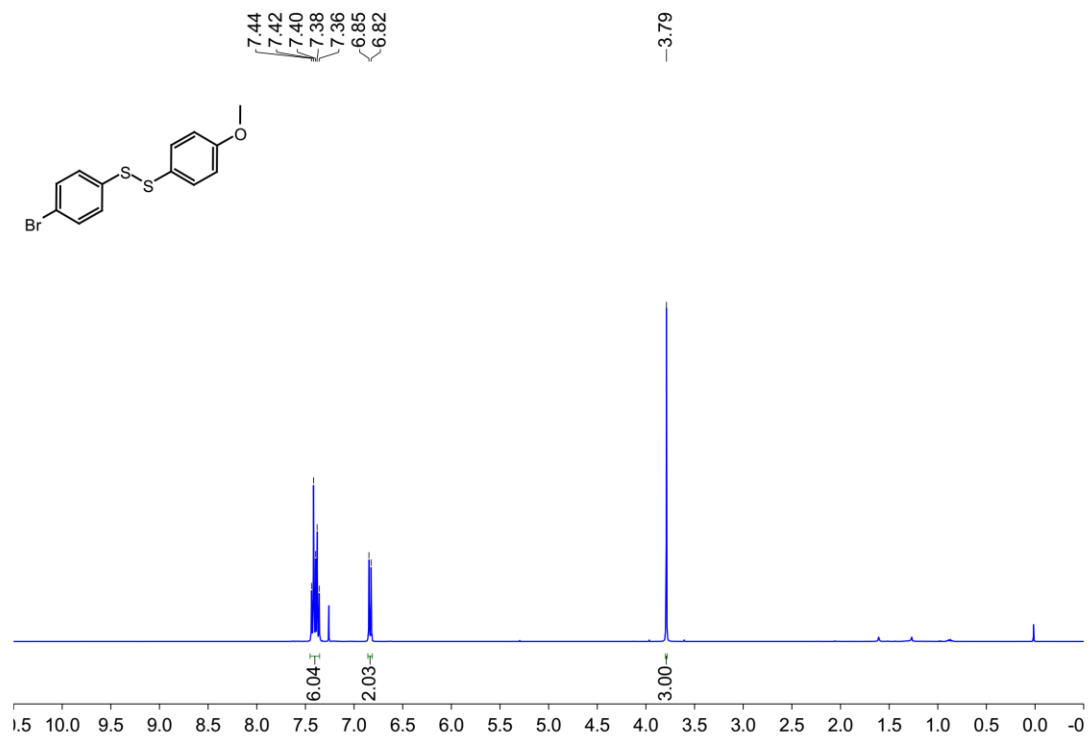

$^1\text{H NMR}$  spectrum of compound **3f**

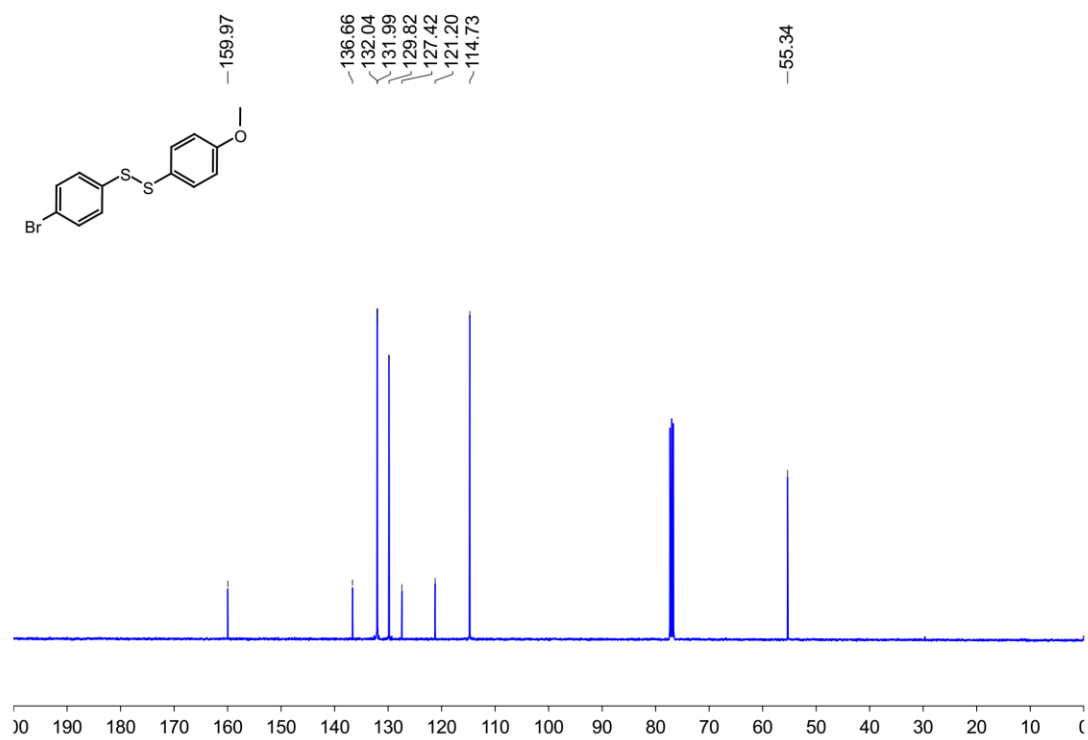

$^{13}\text{C NMR}$  spectrum of compound **3f**

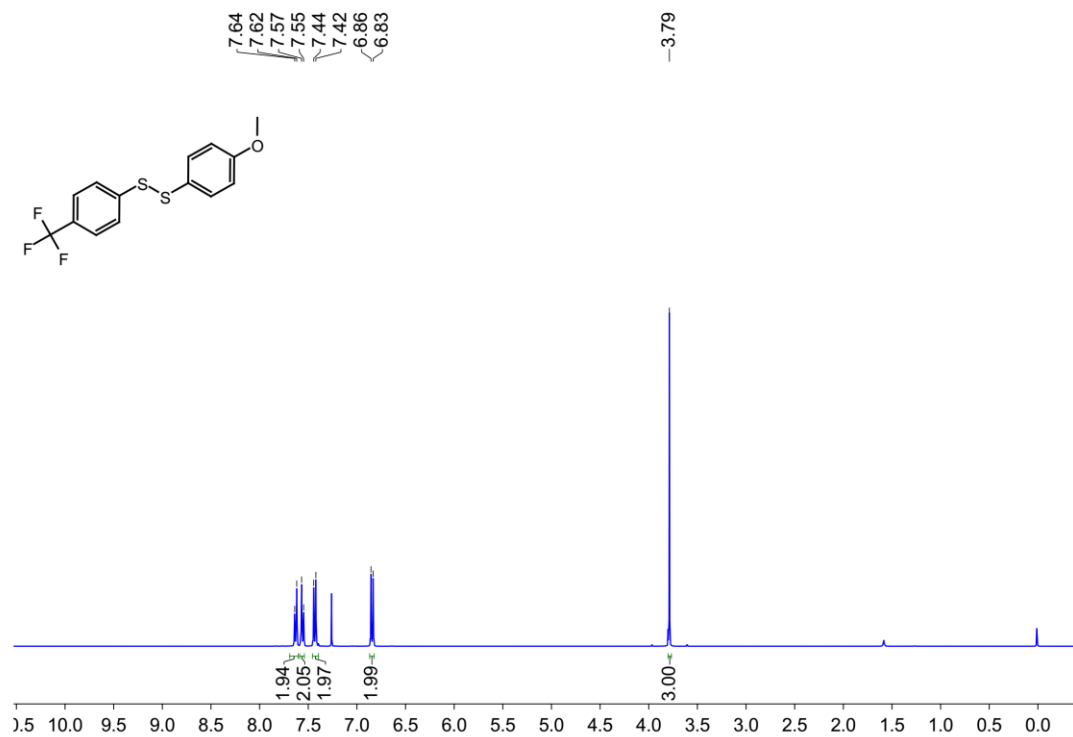

<sup>1</sup>H NMR spectrum of compound **3g**

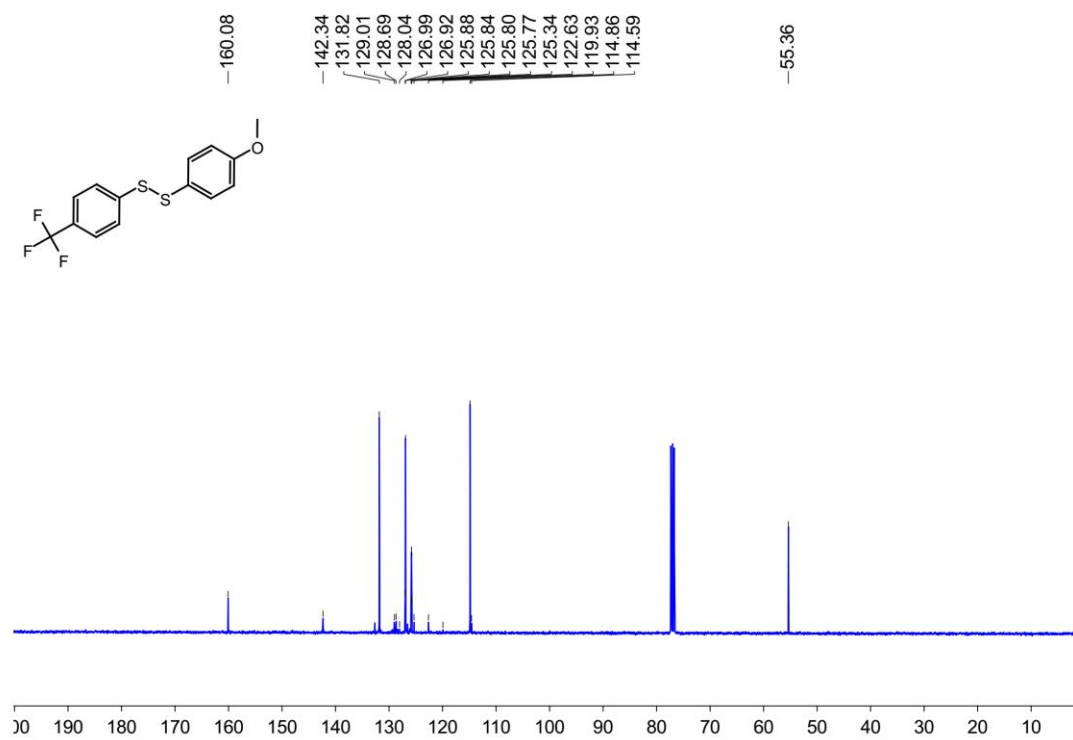

<sup>13</sup>C NMR spectrum of compound **3g**

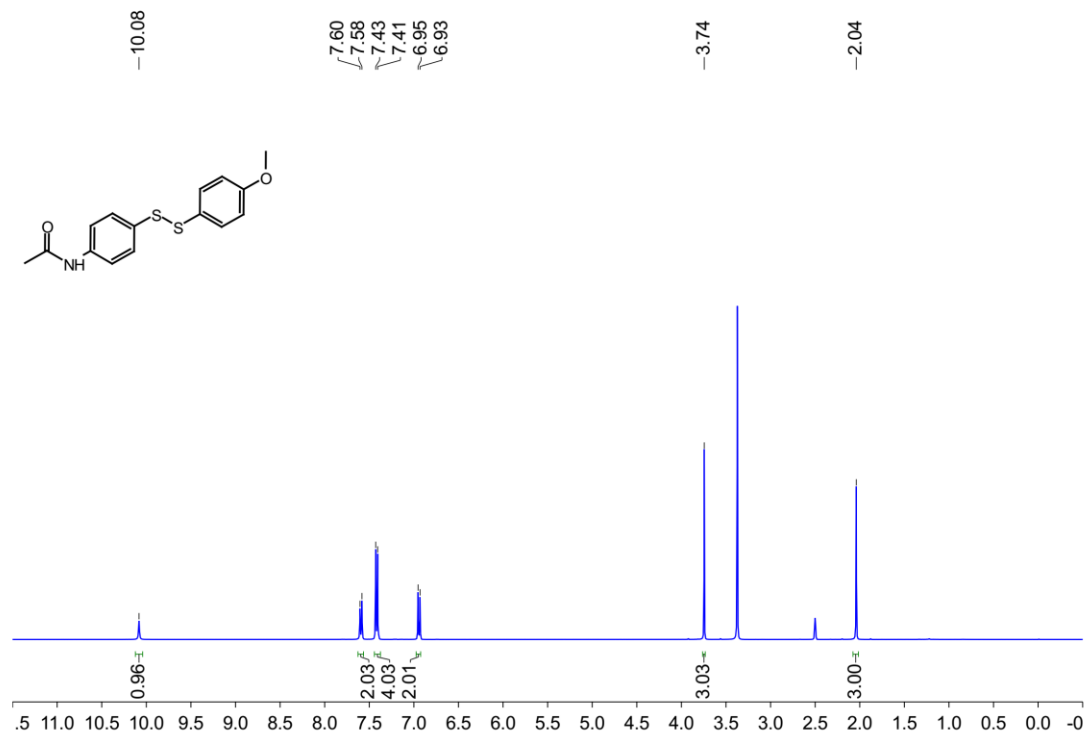

$^1\text{H}$  NMR spectrum of compound **3h**

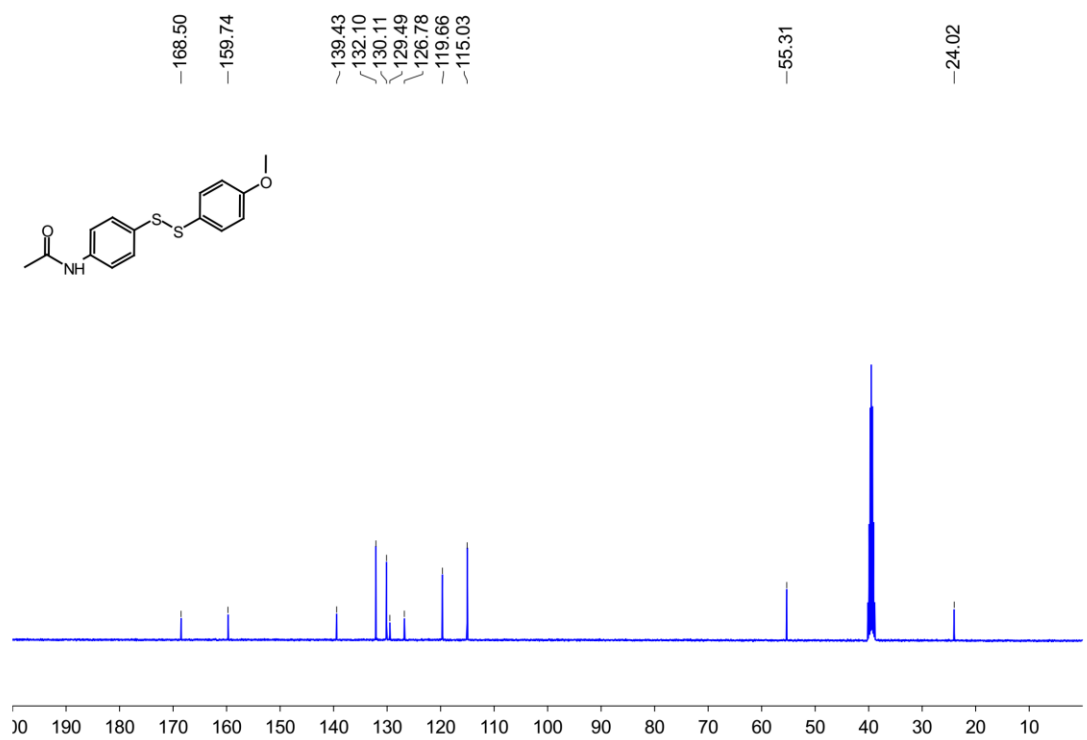

$^{13}\text{C}$  NMR spectrum of compound **3h**

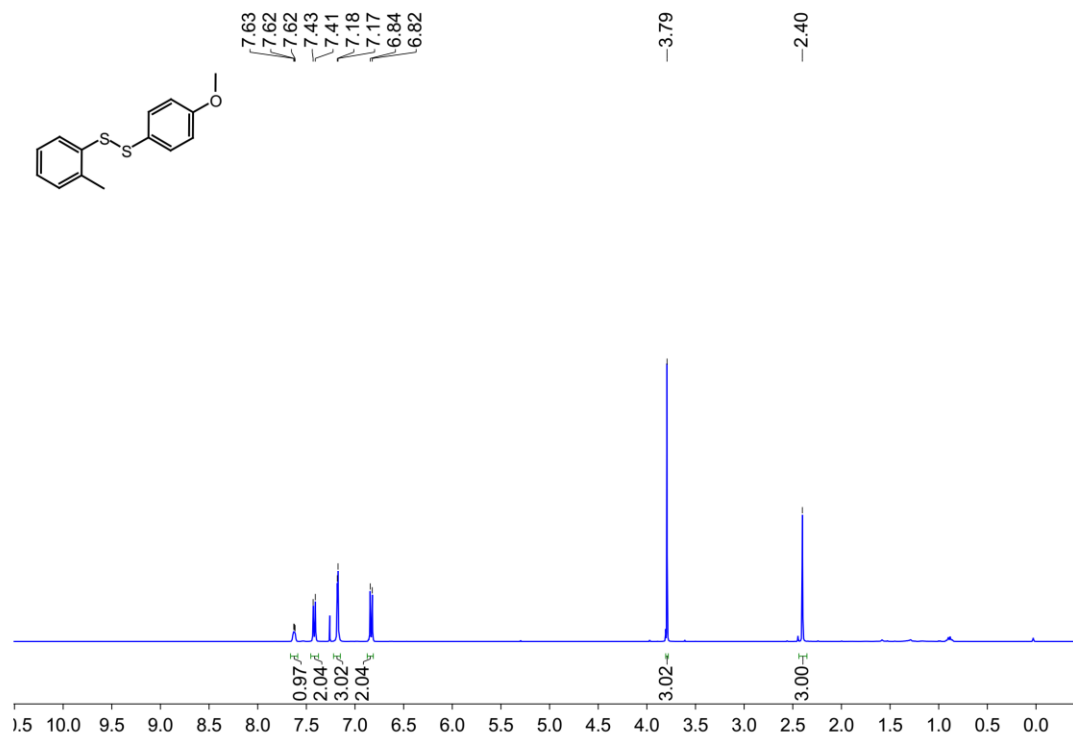

<sup>1</sup>H NMR spectrum of compound **3i**

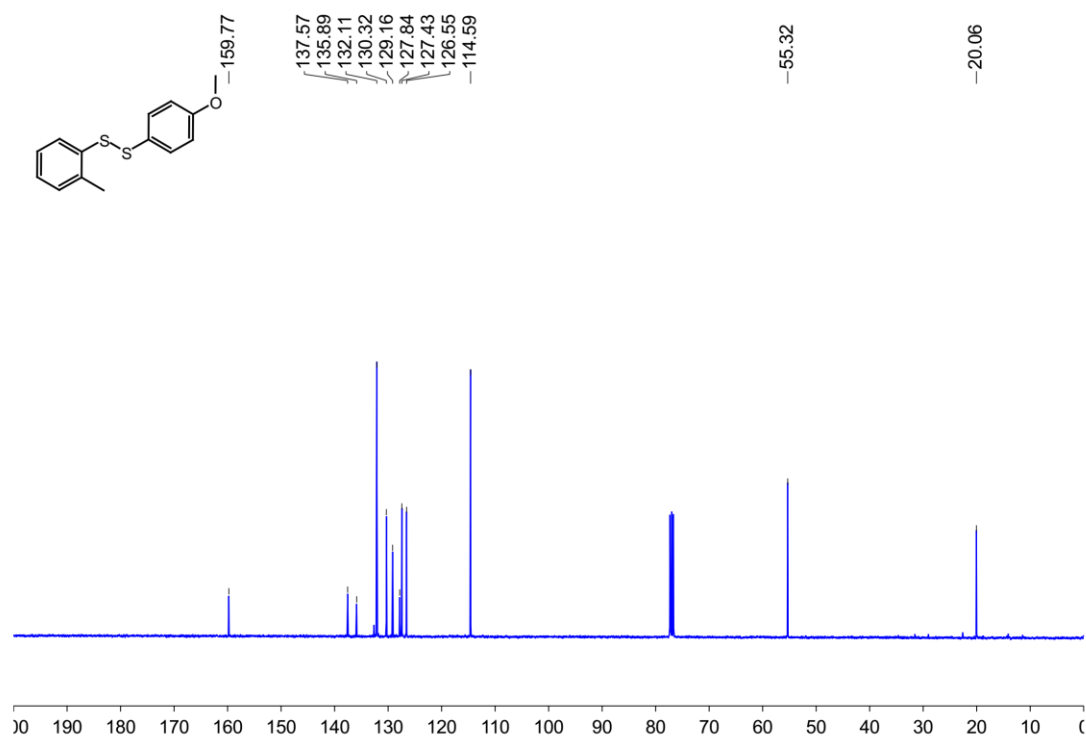

<sup>13</sup>C NMR spectrum of compound **3i**

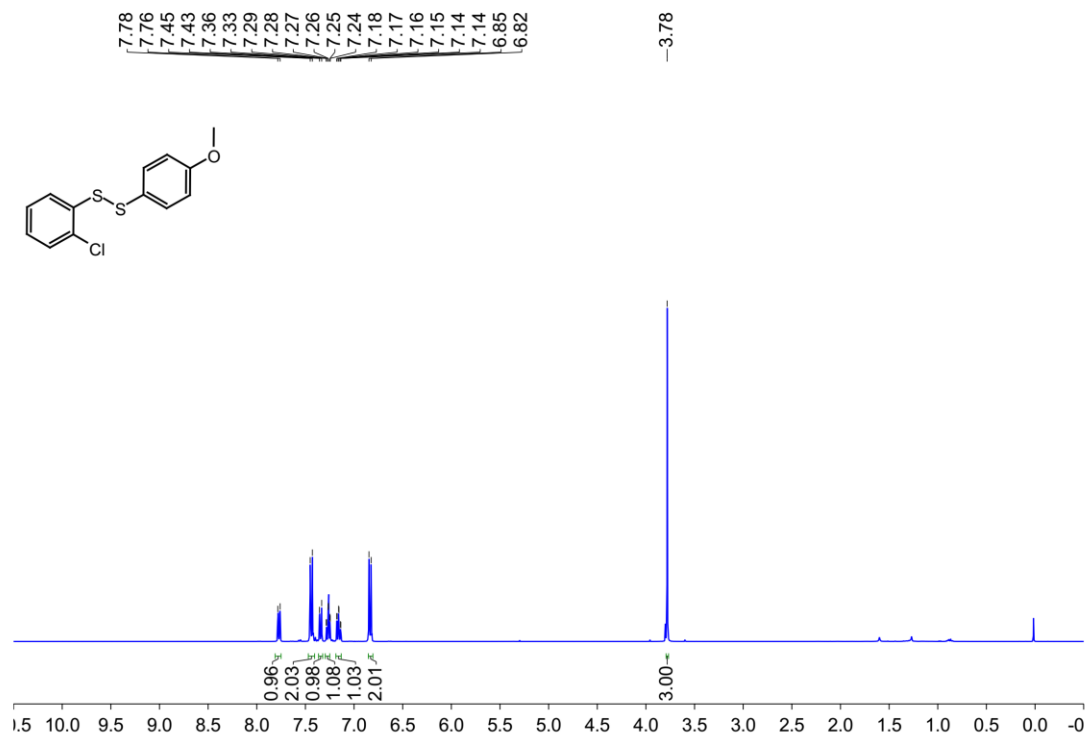

$^1\text{H NMR}$  spectrum of compound **3j**

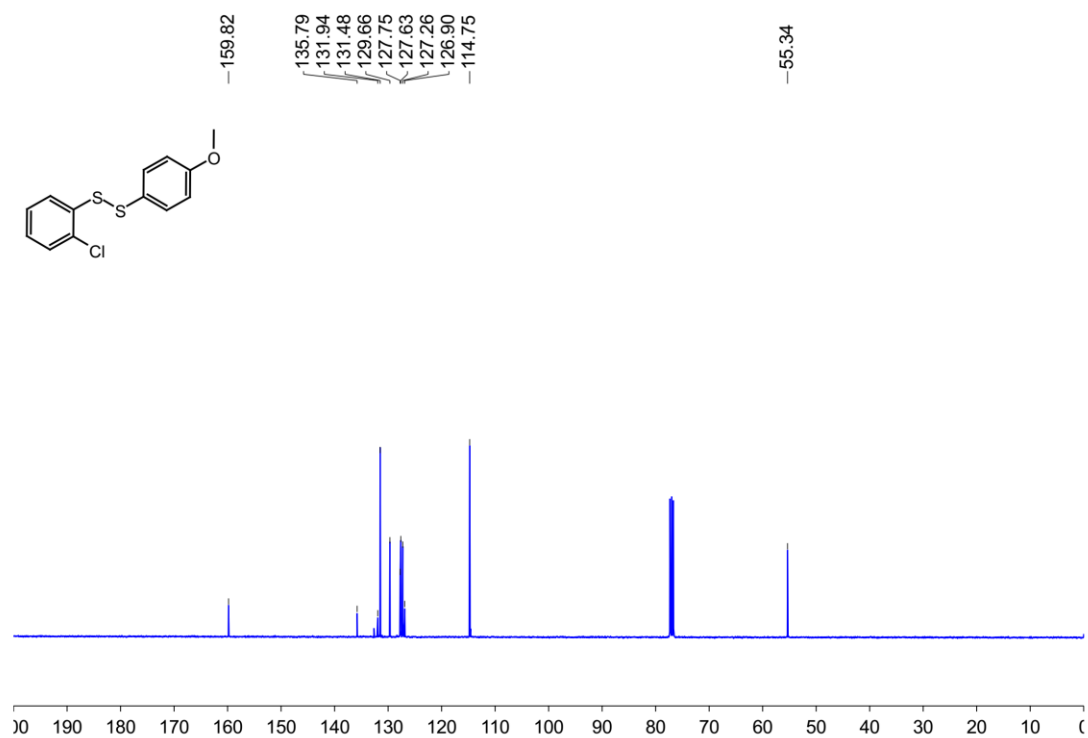

$^{13}\text{C NMR}$  spectrum of compound **3j**

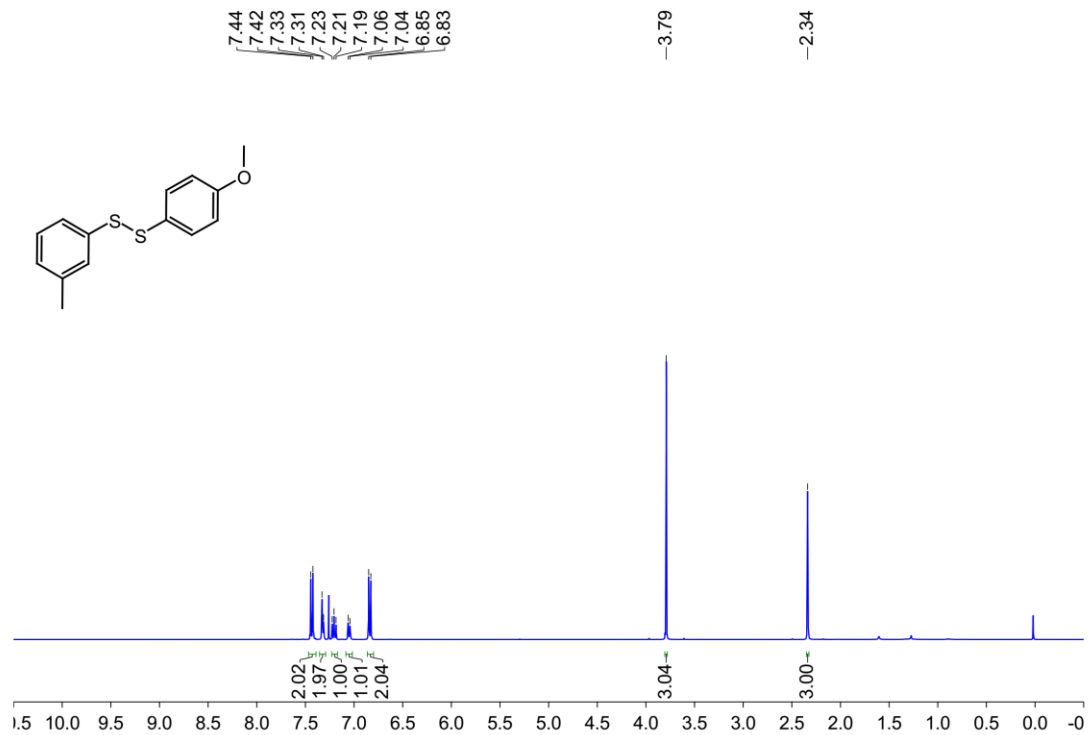

<sup>1</sup>H NMR spectrum of compound **3k**

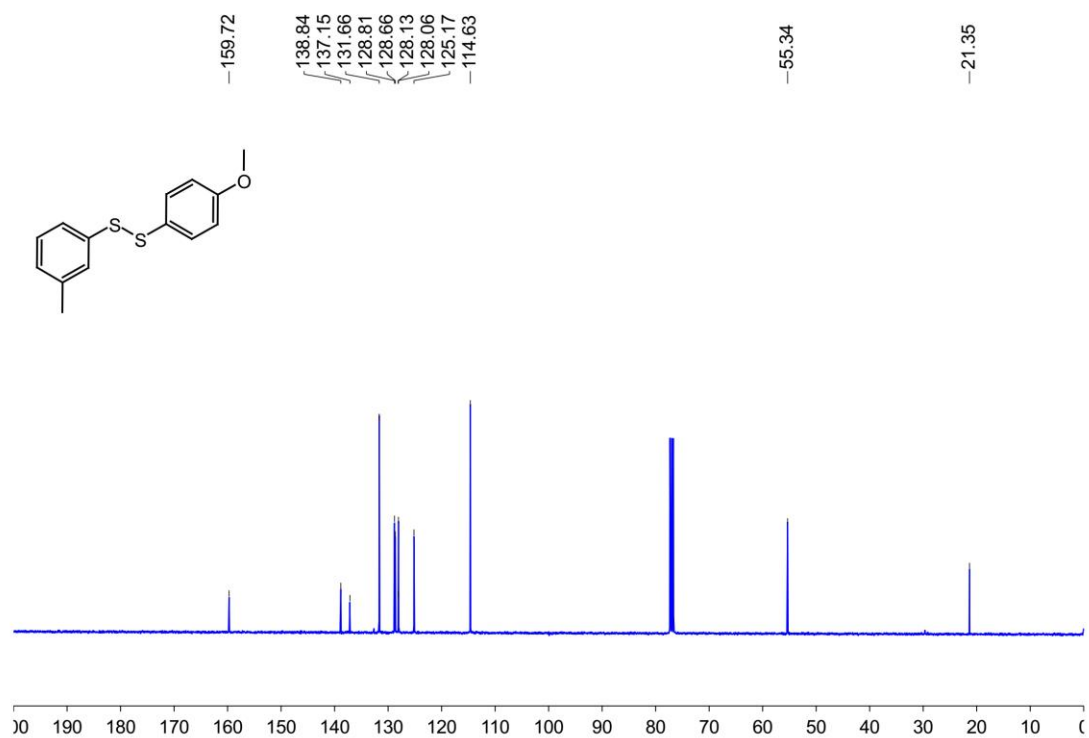

<sup>13</sup>C NMR spectrum of compound **3k**



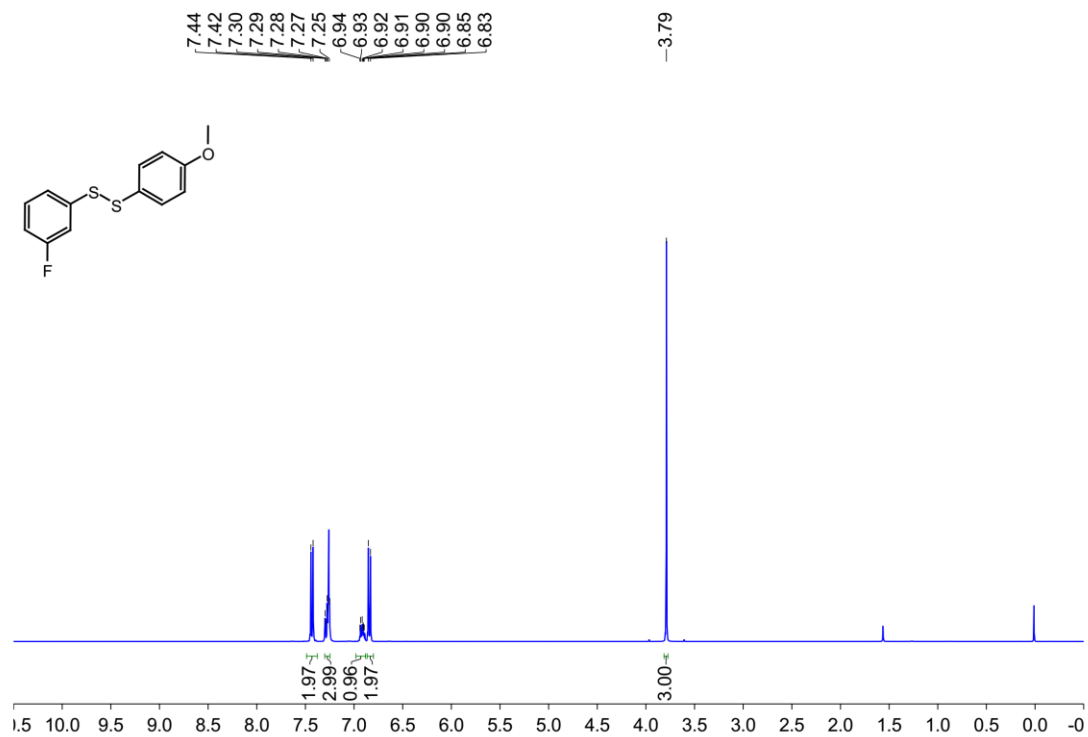

<sup>1</sup>H NMR spectrum of compound **31**

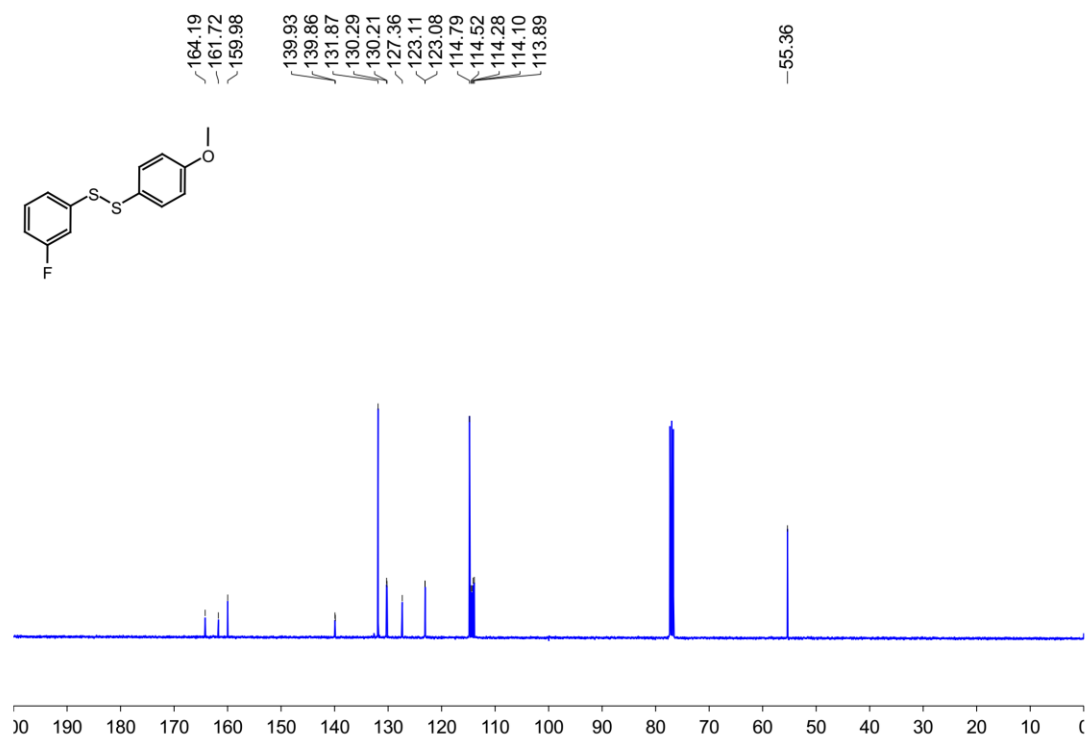

<sup>13</sup>C NMR spectrum of compound **31**

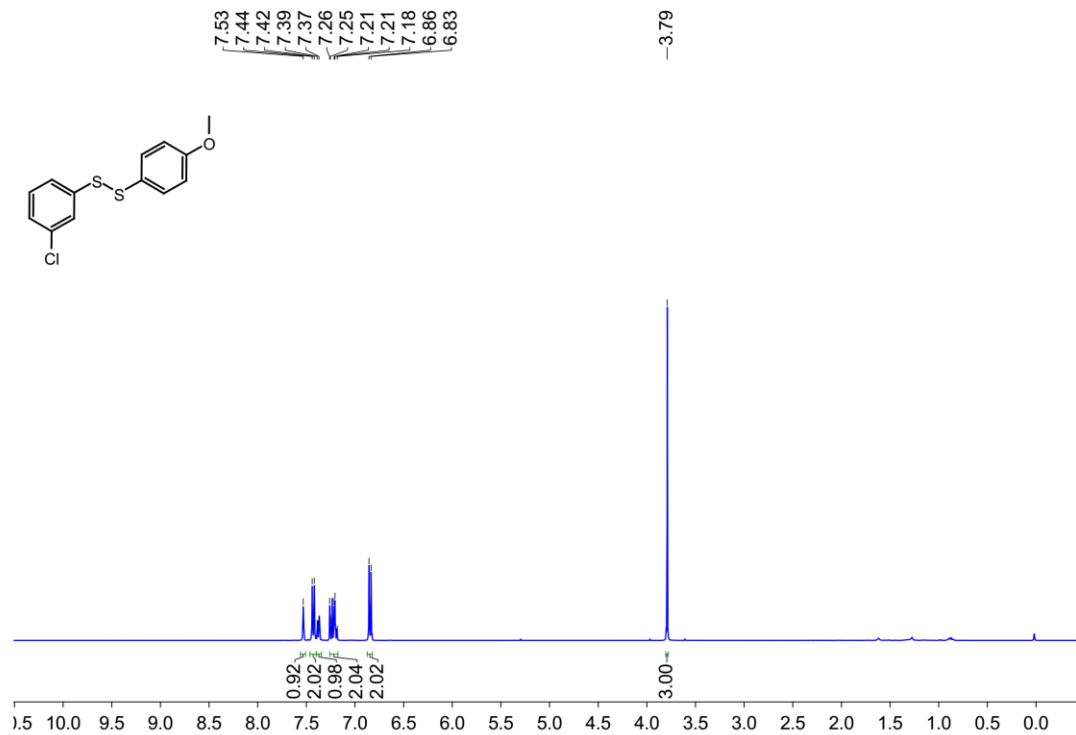

$^1\text{H}$  NMR spectrum of compound **3m**

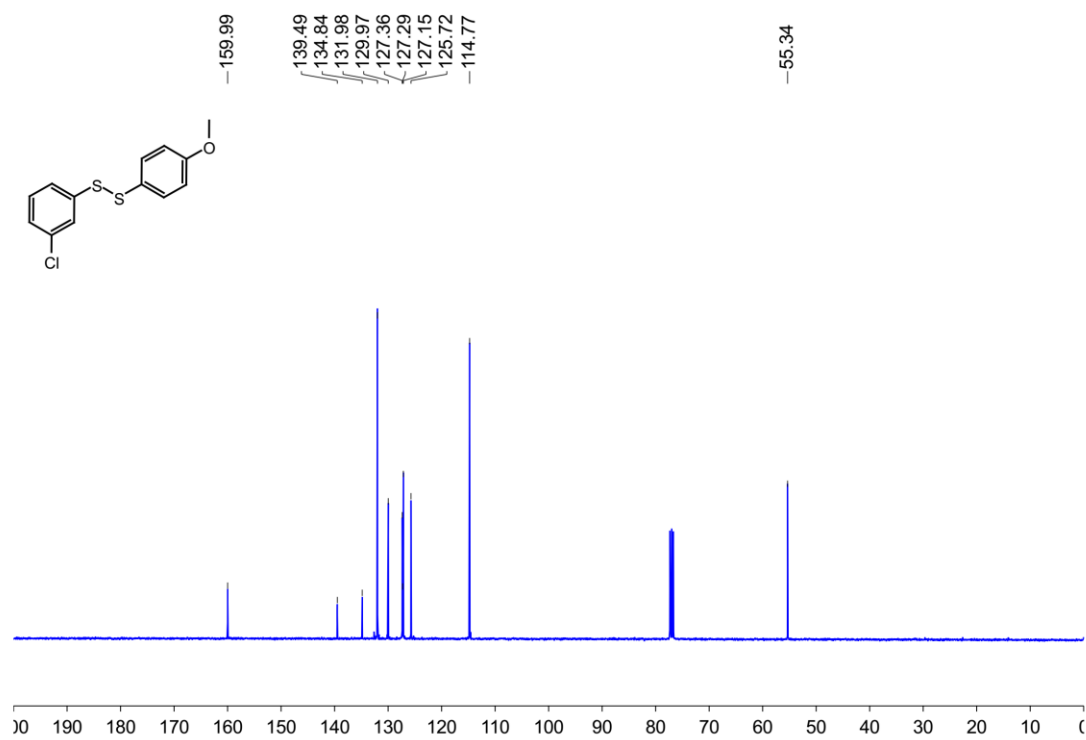

$^{13}\text{C}$  NMR spectrum of compound **3m**

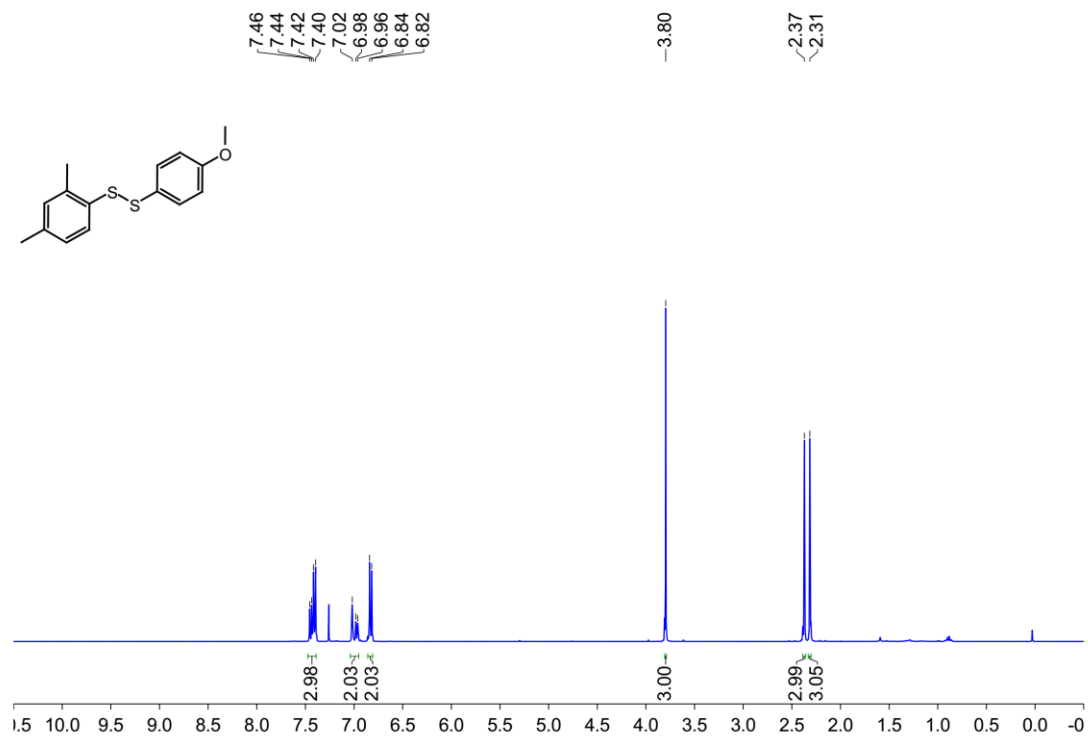

$^1\text{H}$  NMR spectrum of compound **3n**

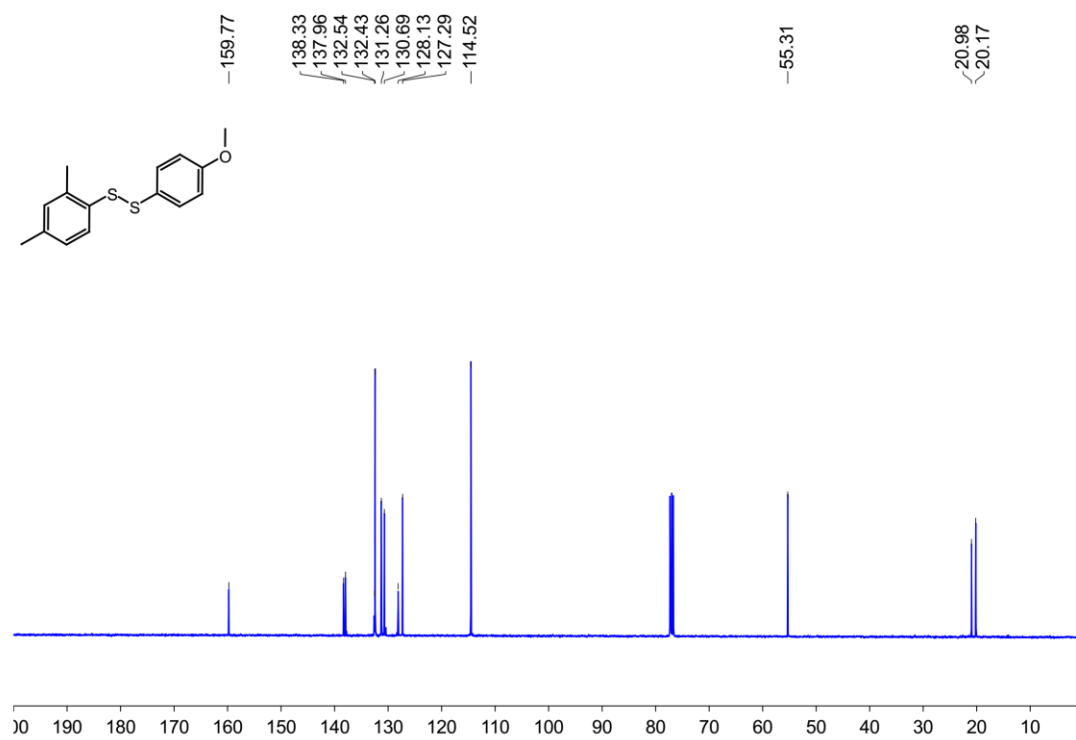

$^{13}\text{C}$  NMR spectrum of compound **3n**

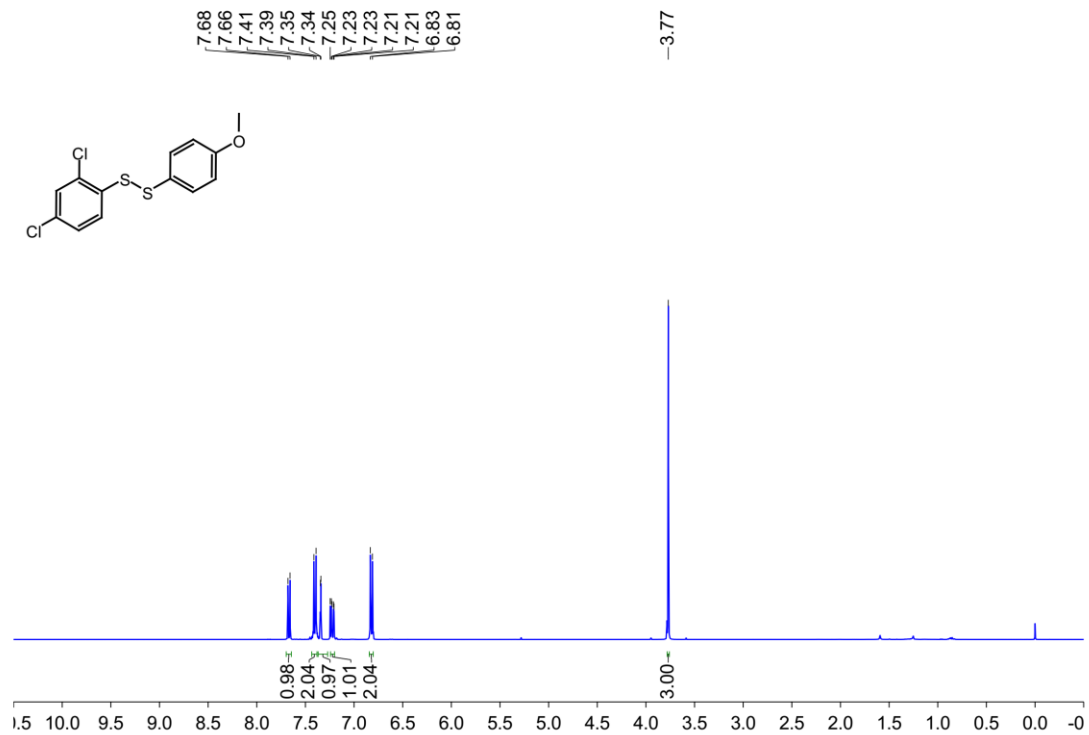

<sup>1</sup>H NMR spectrum of compound **3o**

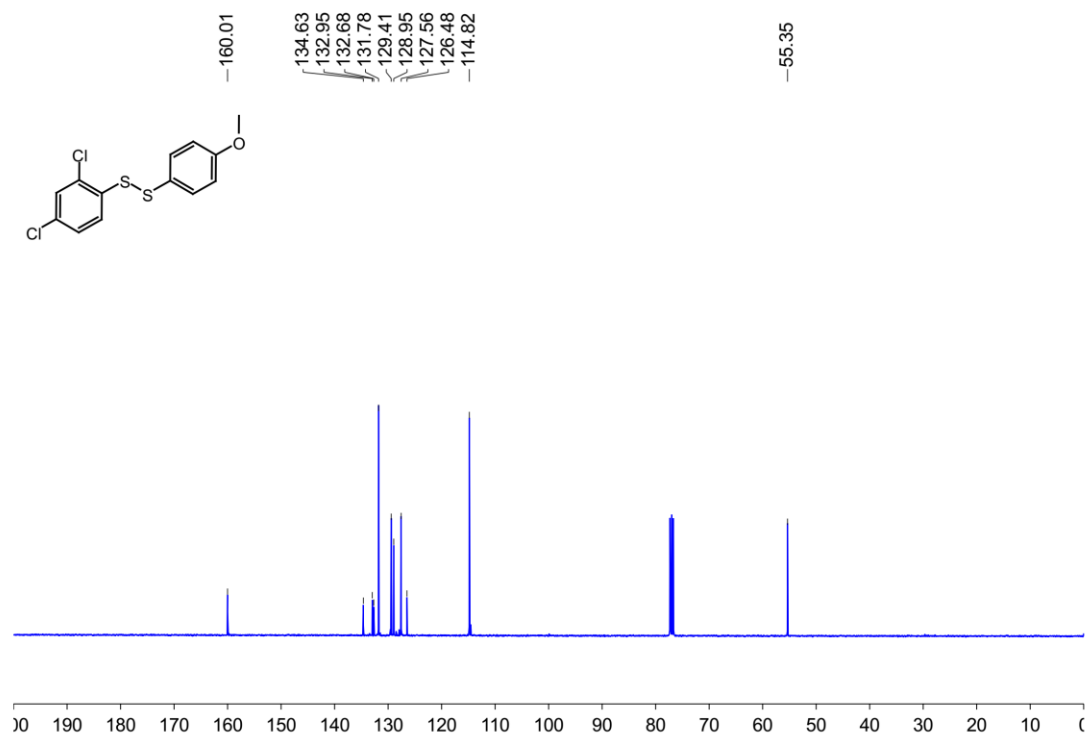

<sup>13</sup>C NMR spectrum of compound **3o**

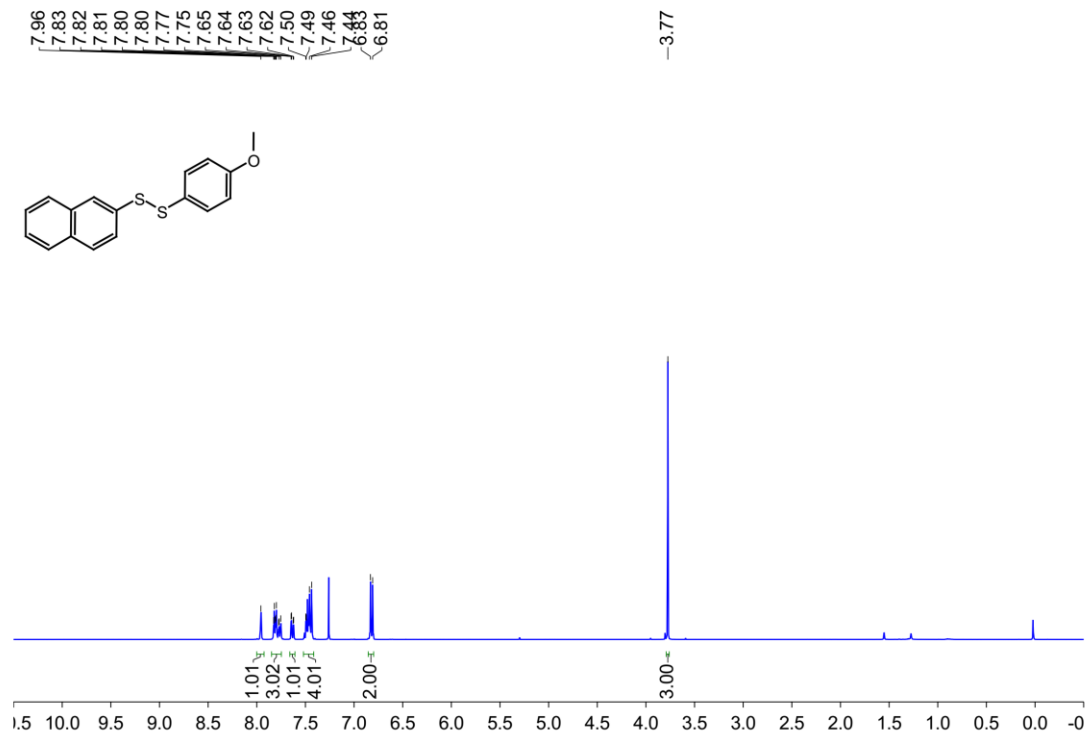

$^1\text{H}$  NMR spectrum of compound **3p**

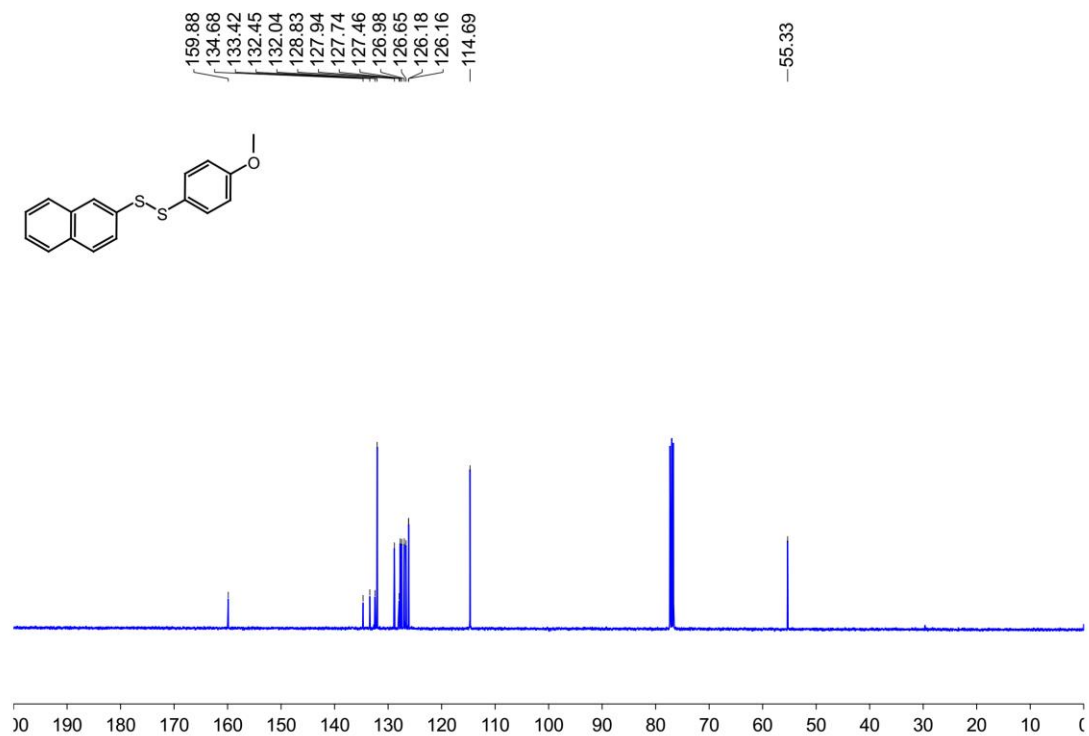

$^{13}\text{C}$  NMR spectrum of compound **3p**

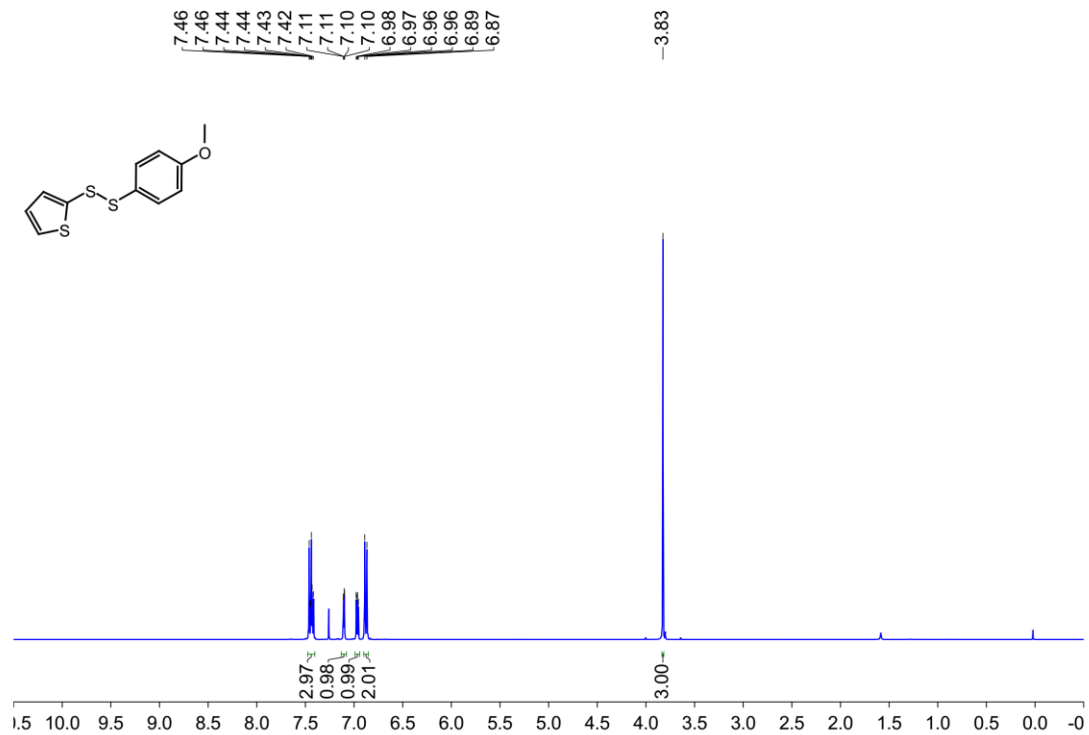

$^1\text{H}$  NMR spectrum of compound **3q**

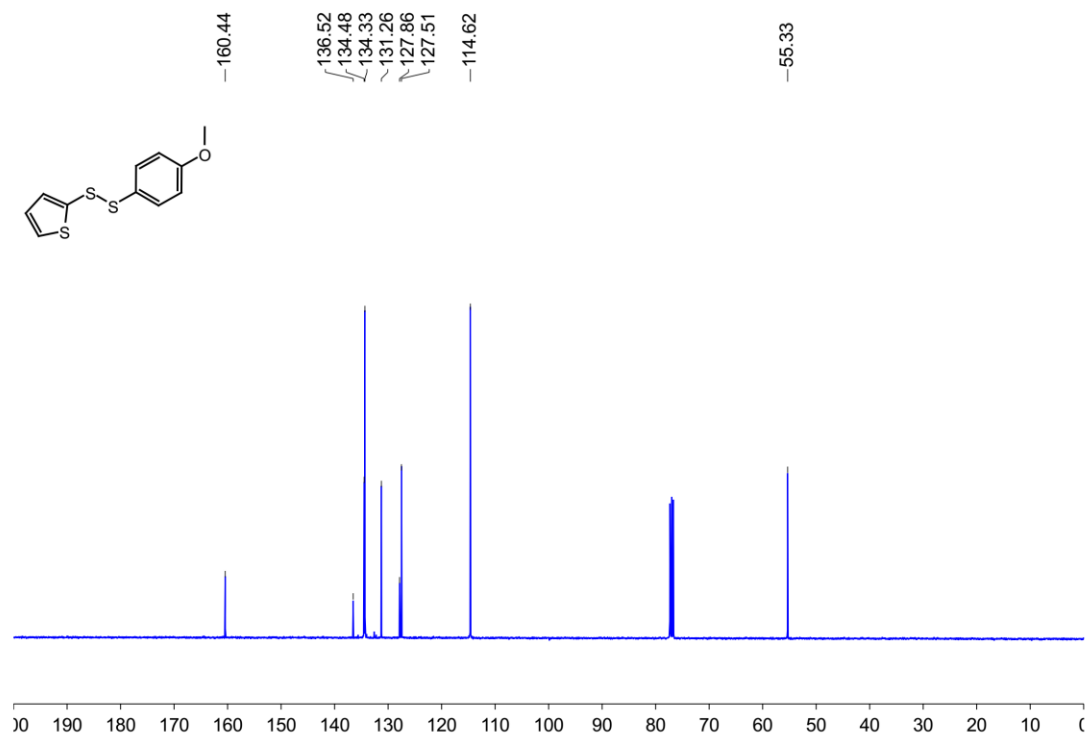

$^{13}\text{C}$  NMR spectrum of compound **3q**

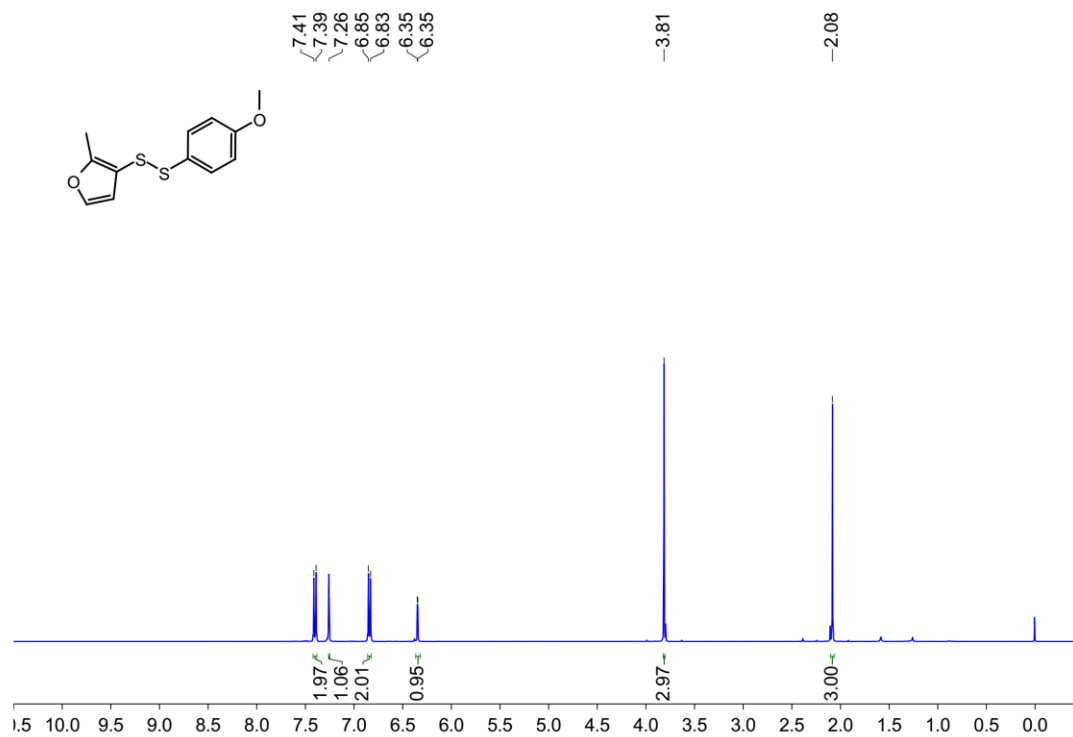

$^1\text{H}$  NMR spectrum of compound **3r**

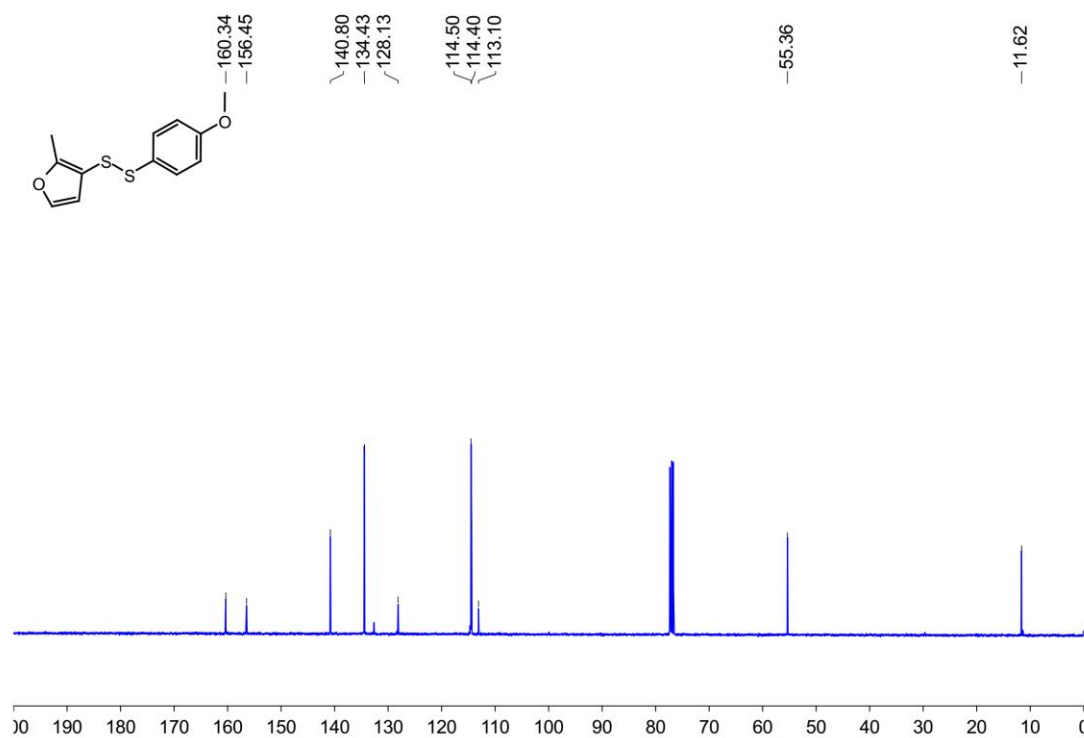

$^{13}\text{C}$  NMR spectrum of compound **3r**

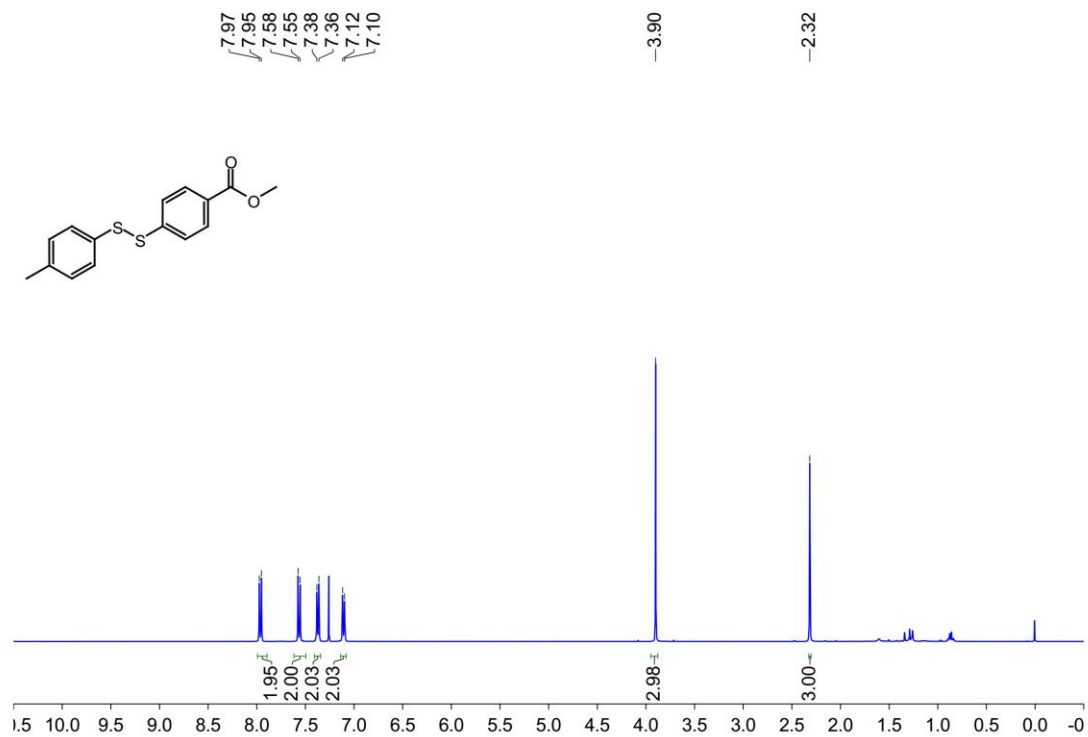

$^1\text{H}$  NMR spectrum of compound **3s**

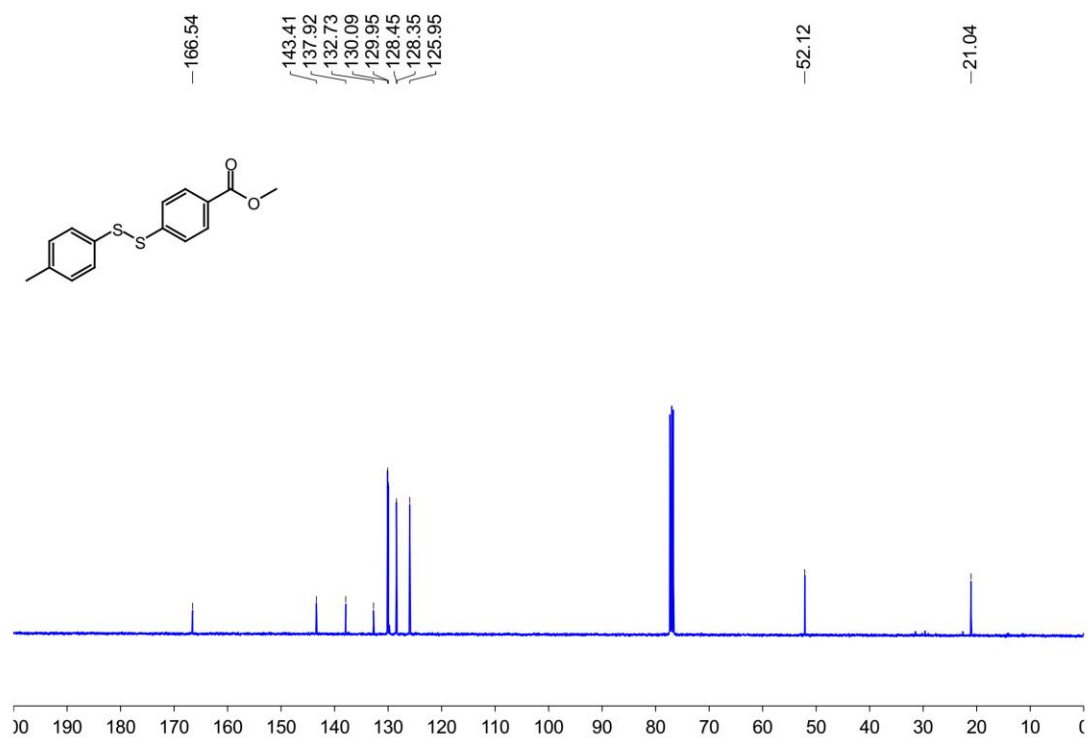

$^{13}\text{C}$  NMR spectrum of compound **3s**



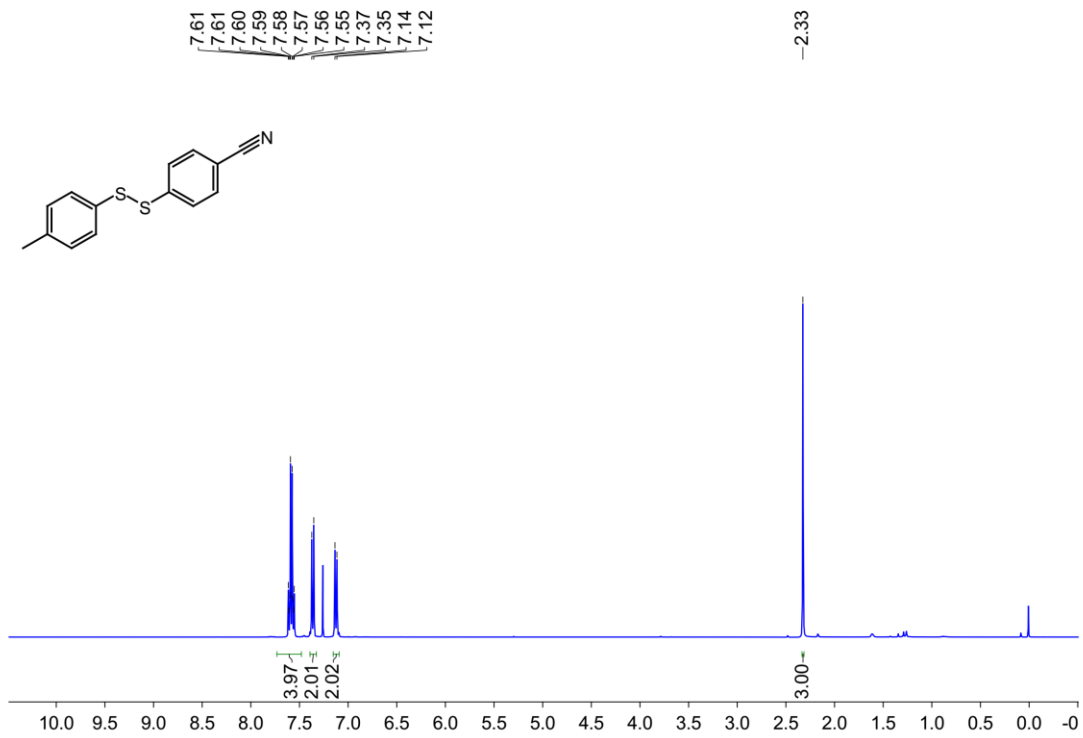

$^1\text{H NMR}$  spectrum of compound **3t**

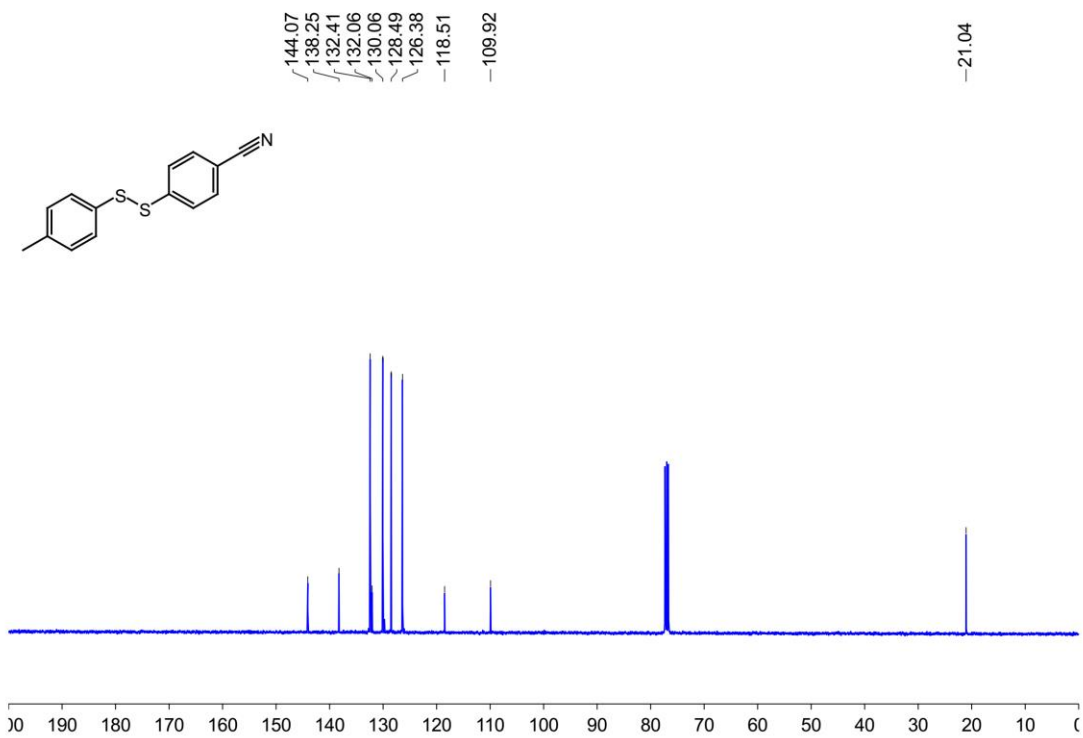

$^{13}\text{C NMR}$  spectrum of compound **3t**

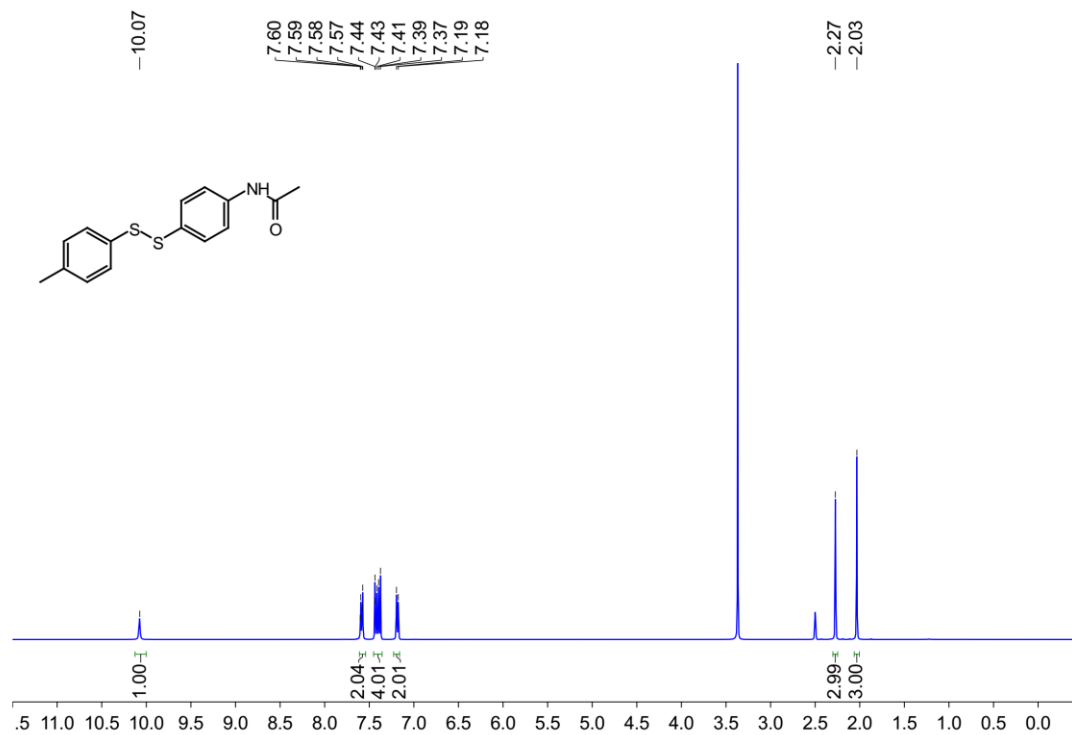

$^1\text{H}$  NMR spectrum of compound **3u**

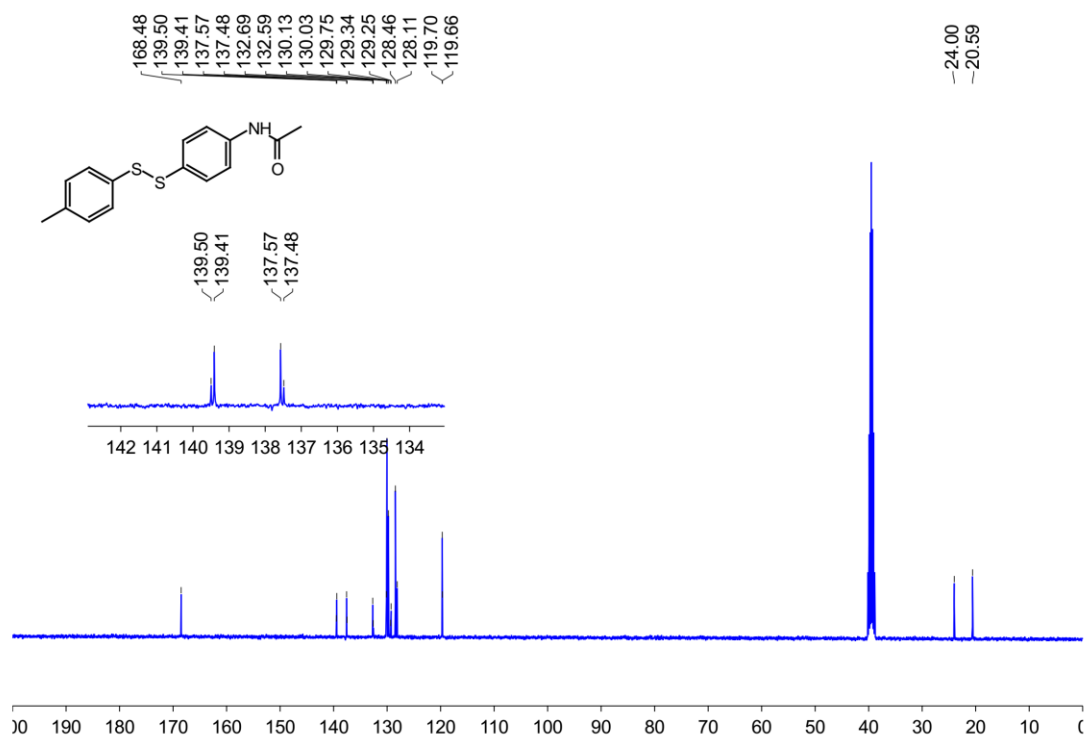

$^{13}\text{C}$  NMR spectrum of compound **3u**

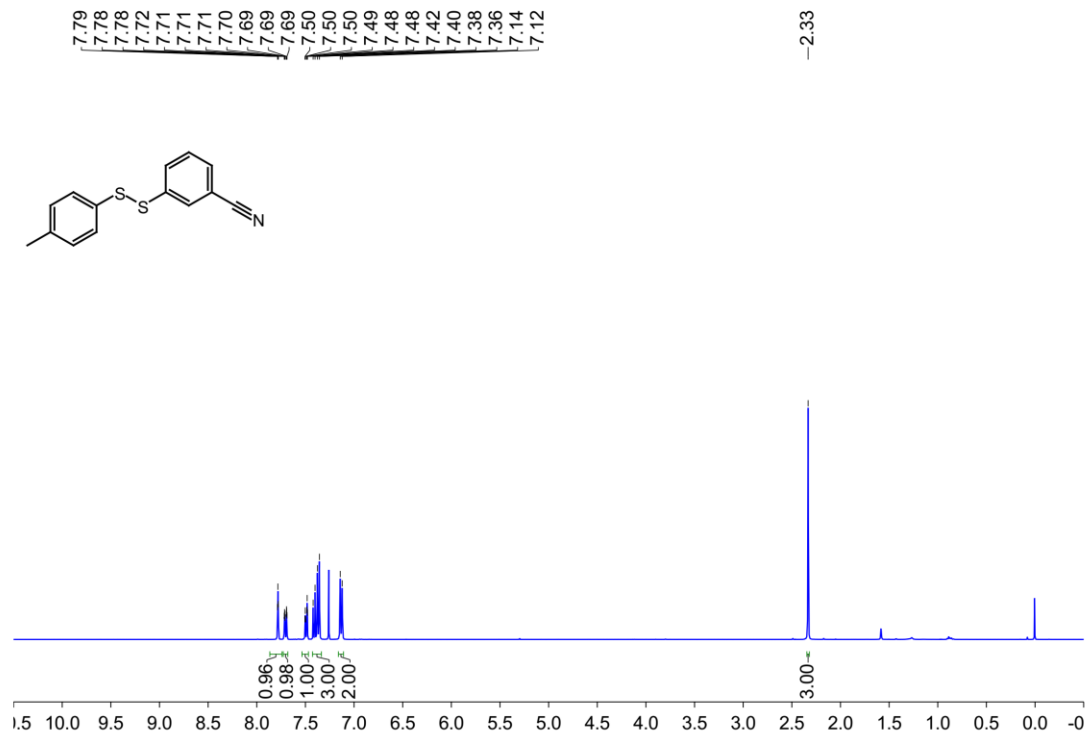

<sup>1</sup>H NMR spectrum of compound **3v**

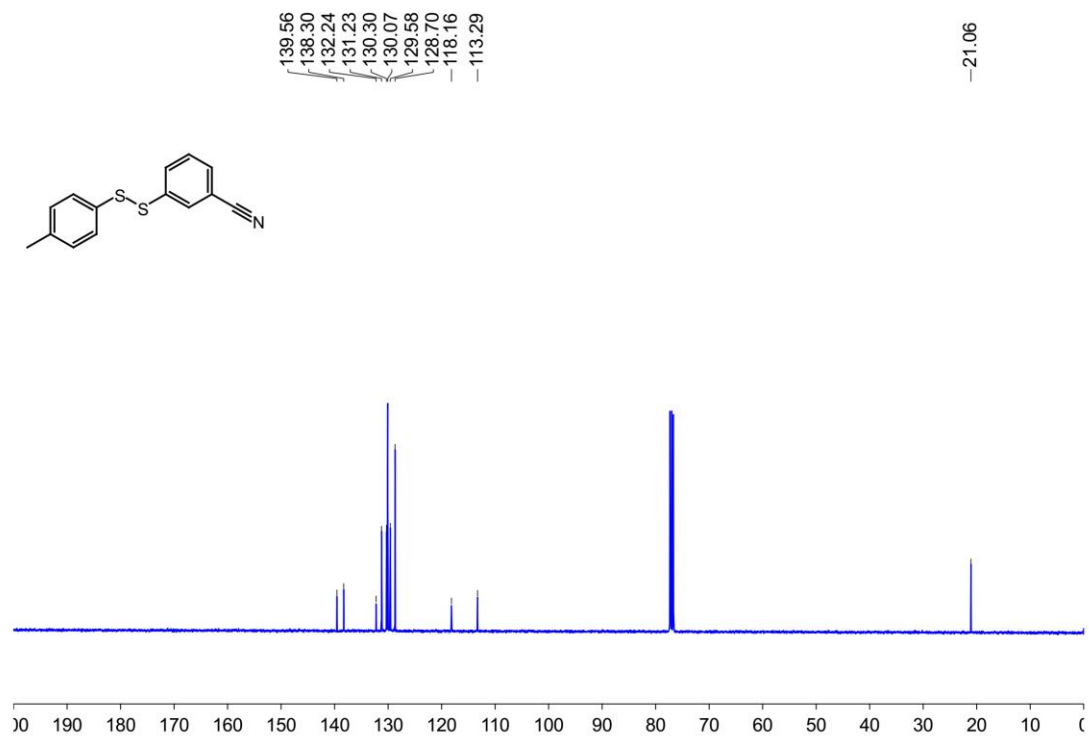

<sup>13</sup>C NMR spectrum of compound **3v**

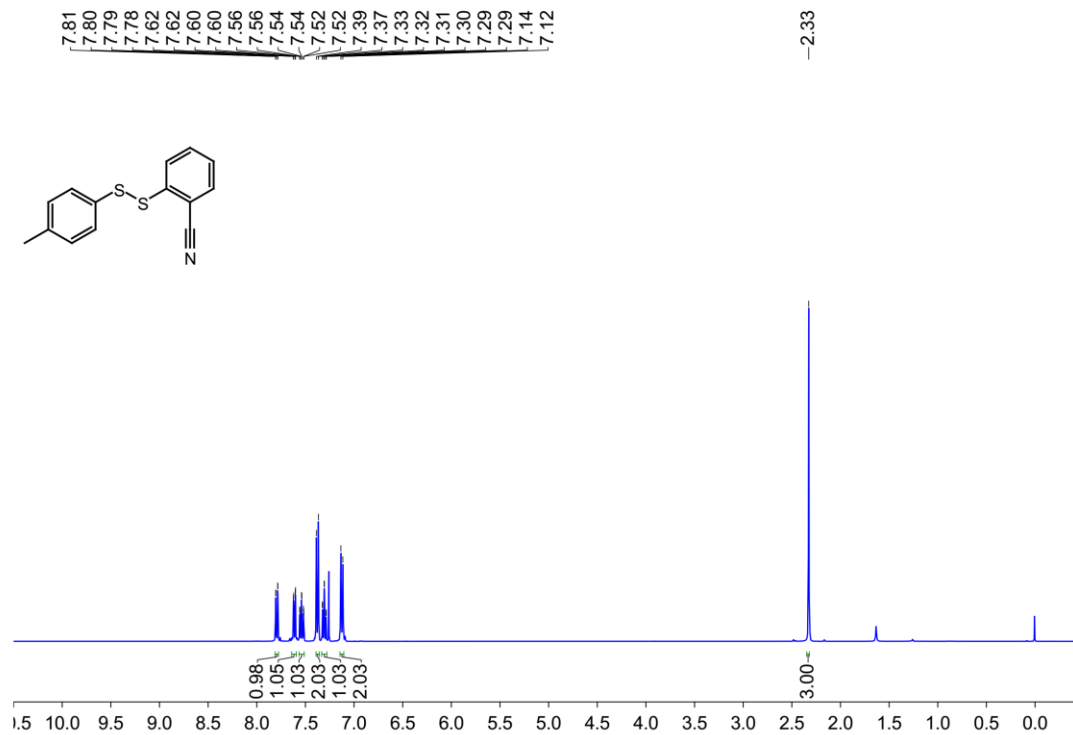

$^1\text{H}$  NMR spectrum of compound **3w**

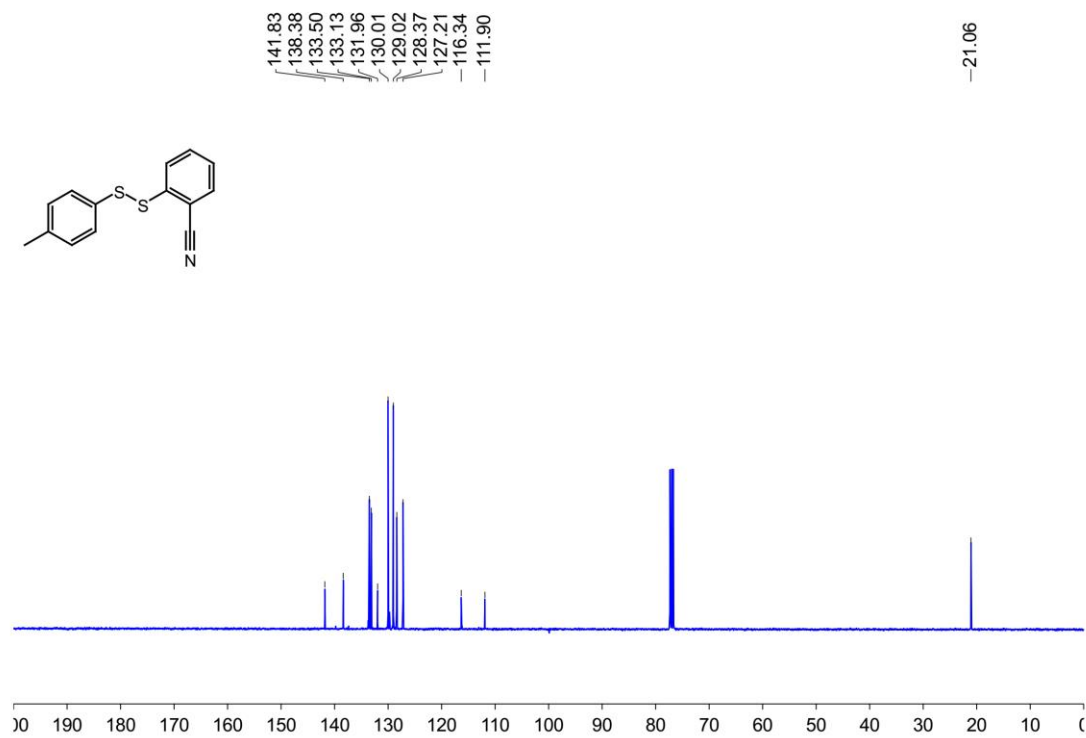

$^{13}\text{C}$  NMR spectrum of compound **3w**

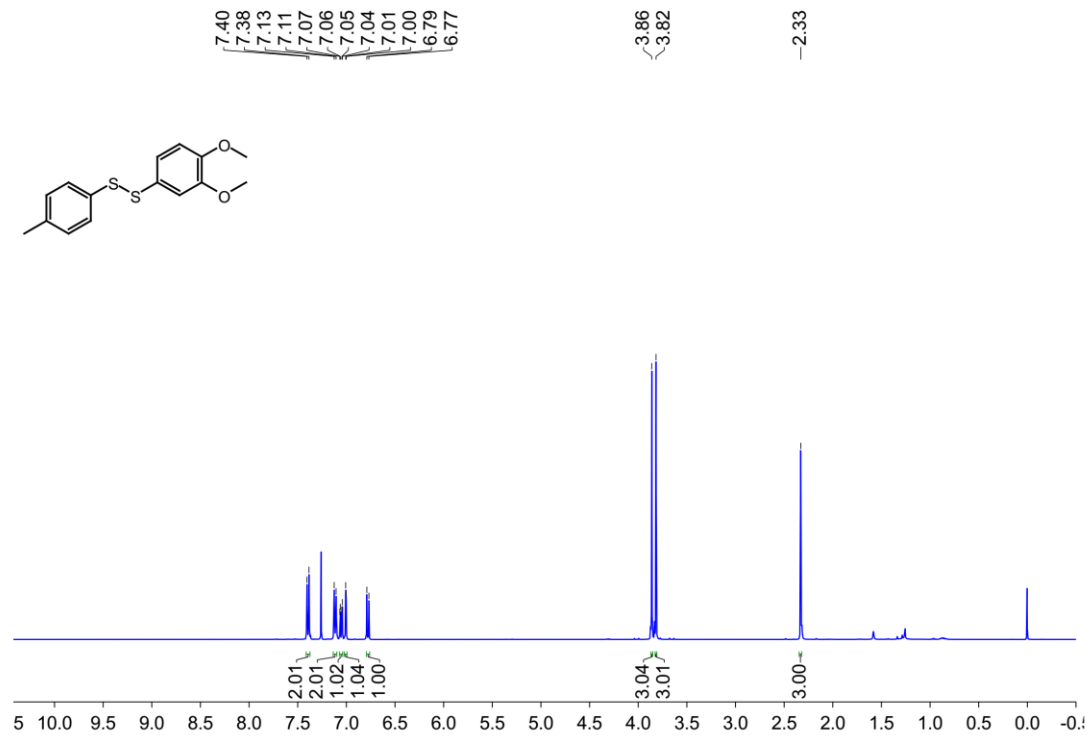

$^1\text{H}$  NMR spectrum of compound **3x**

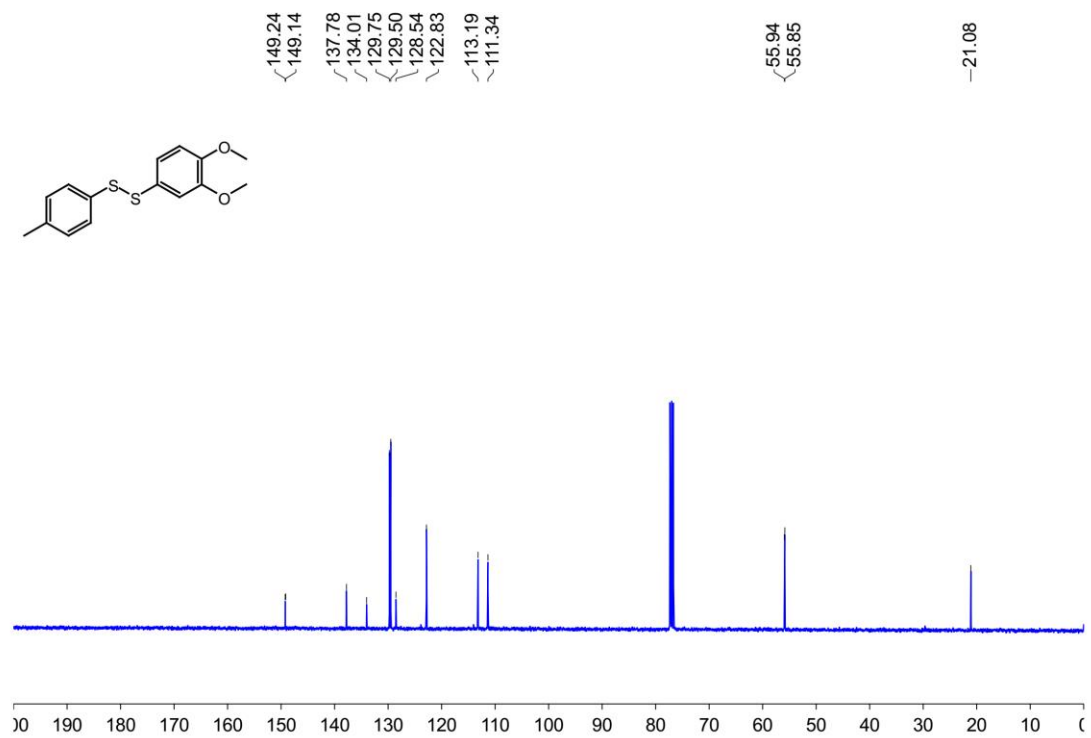

$^{13}\text{C}$  NMR spectrum of compound **3x**

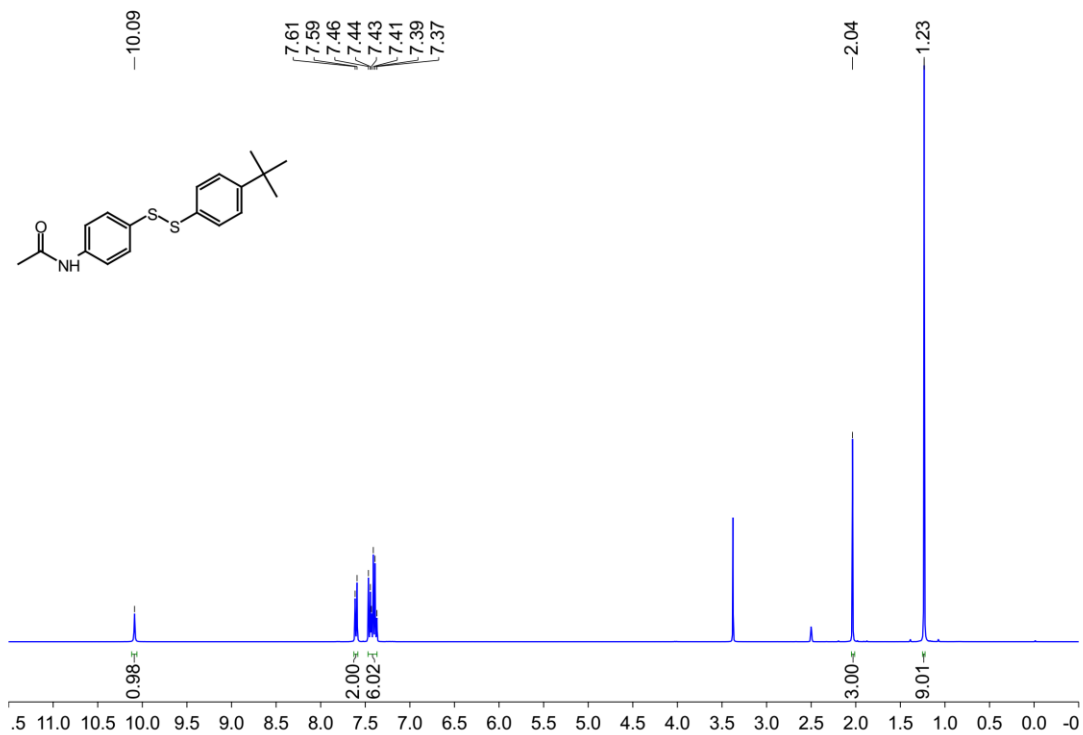

$^1\text{H}$  NMR spectrum of compound **3y**

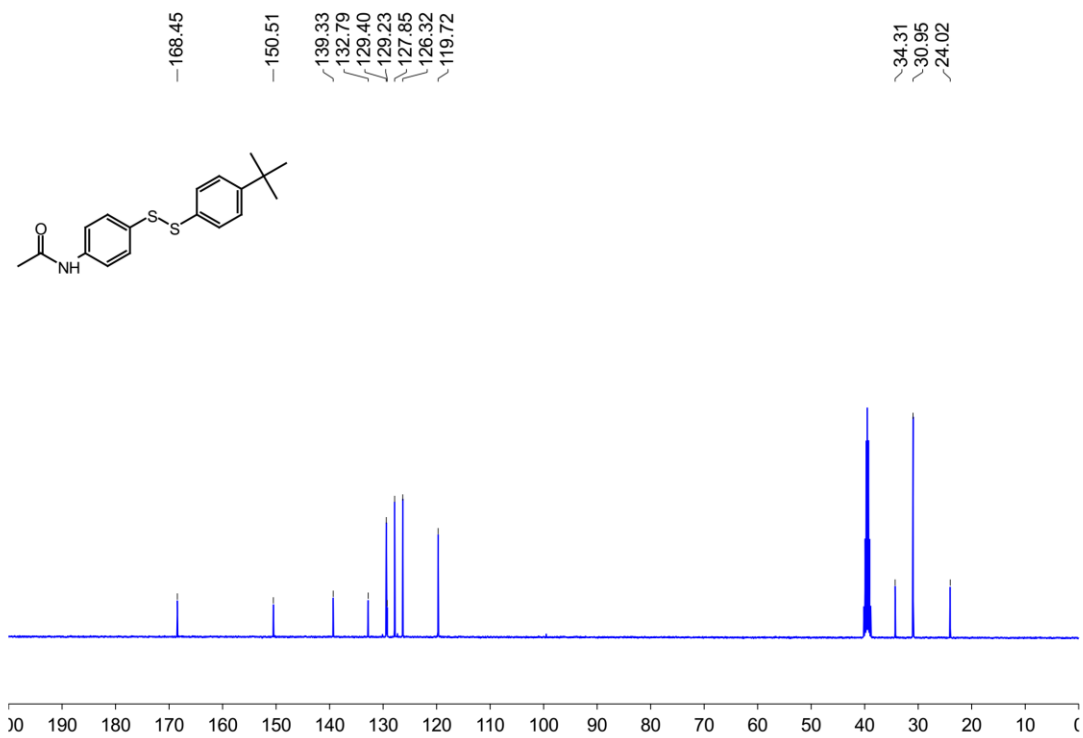

$^{13}\text{C}$  NMR spectrum of compound **3y**

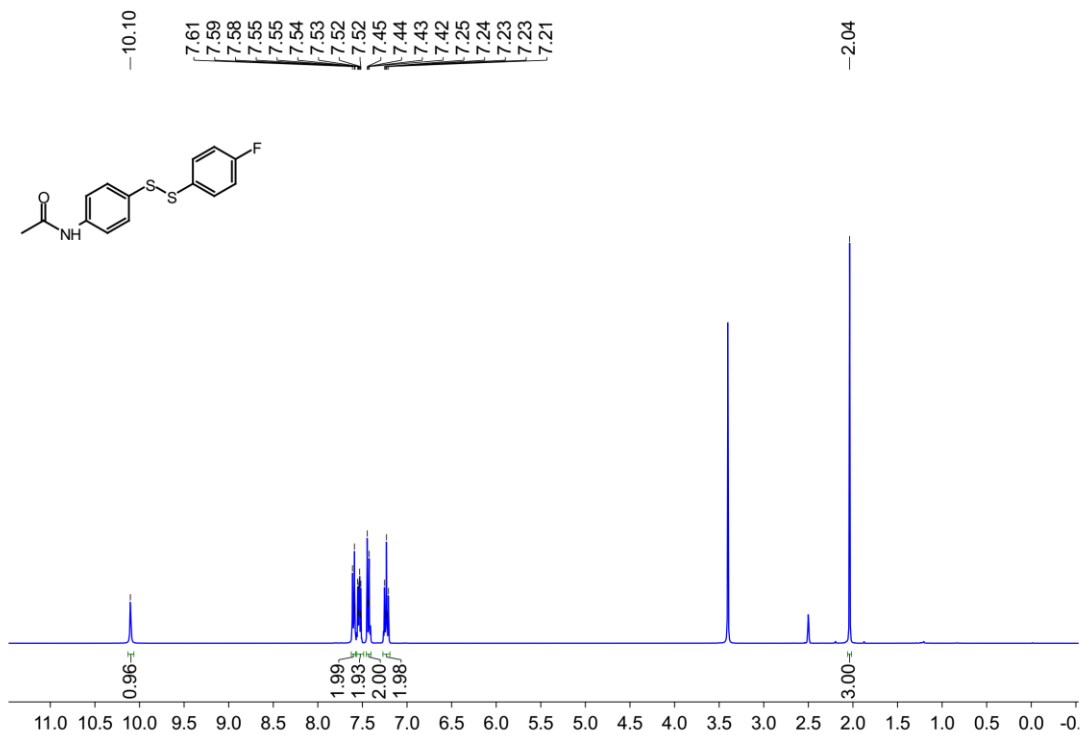

$^1\text{H}$  NMR spectrum of compound **3z**

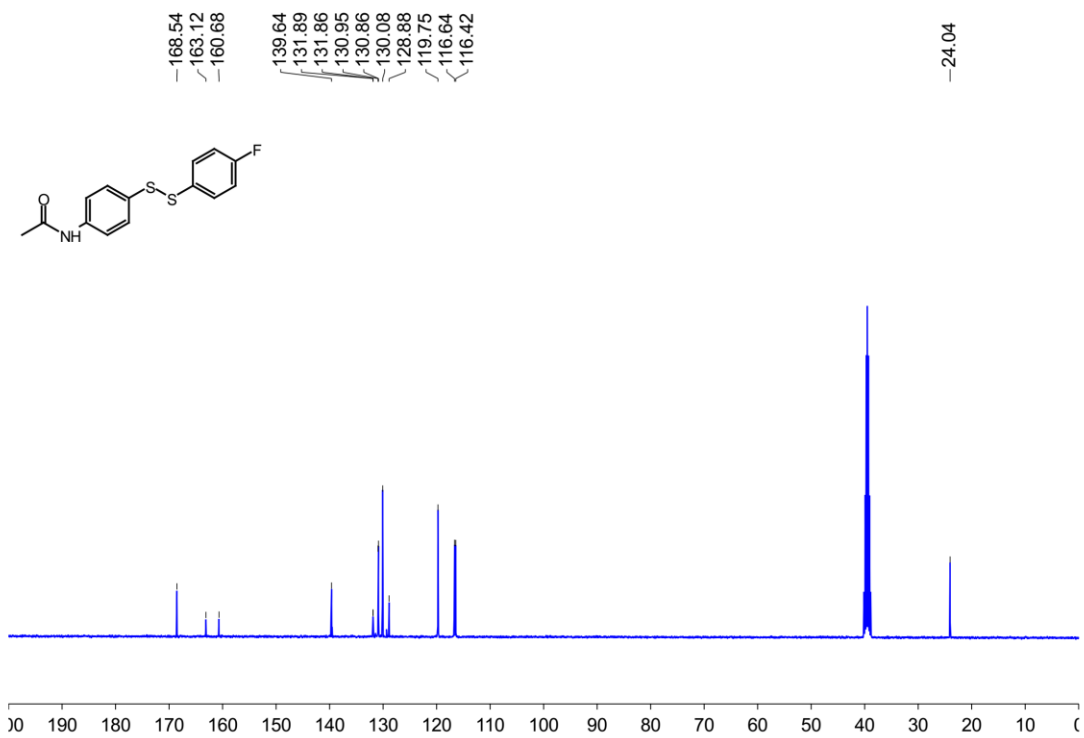

$^{13}\text{C}$  NMR spectrum of compound **3z**

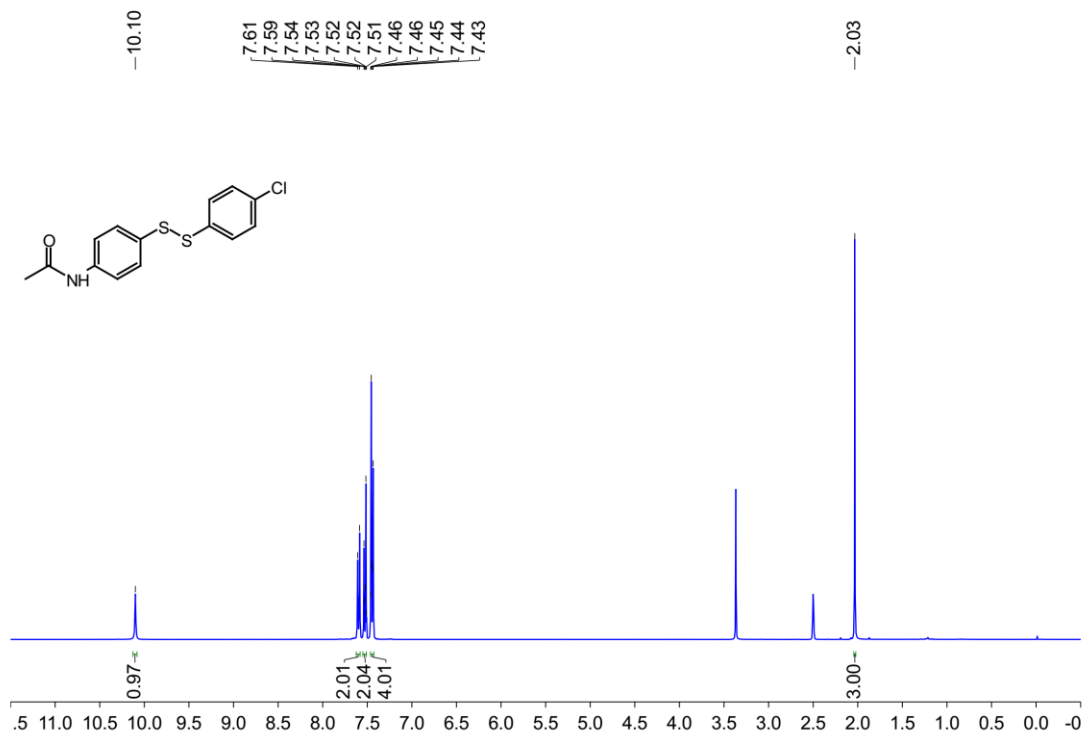

$^1\text{H}$  NMR spectrum of compound **4a**

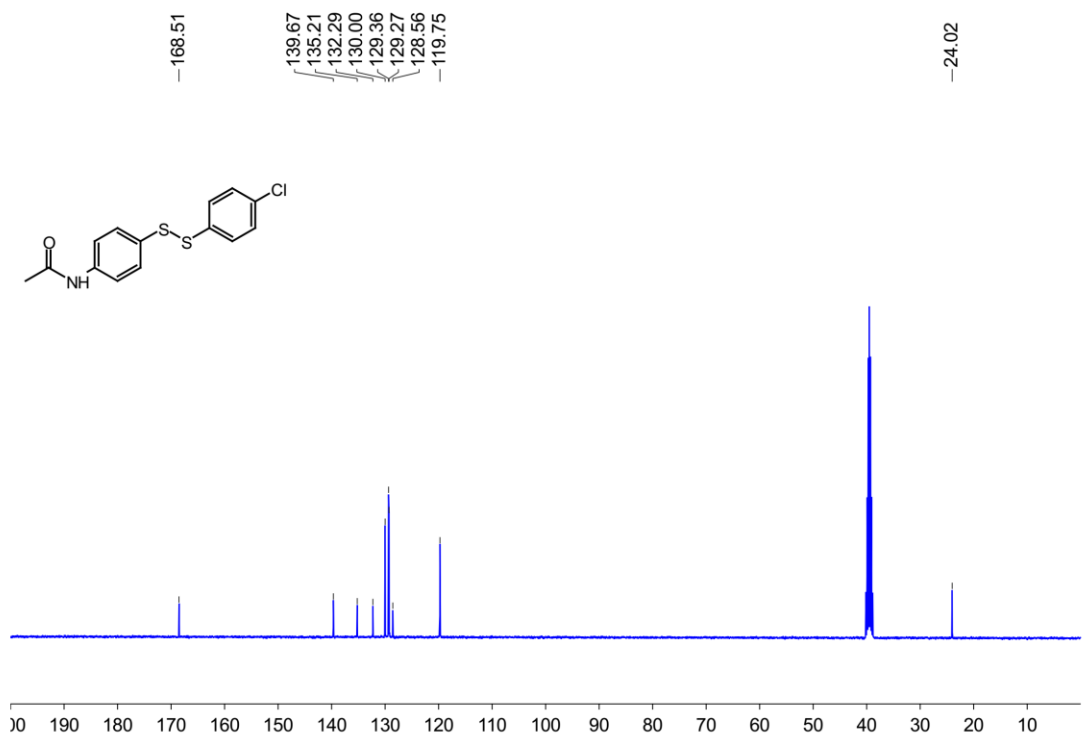

$^{13}\text{C}$  NMR spectrum of compound **4a**



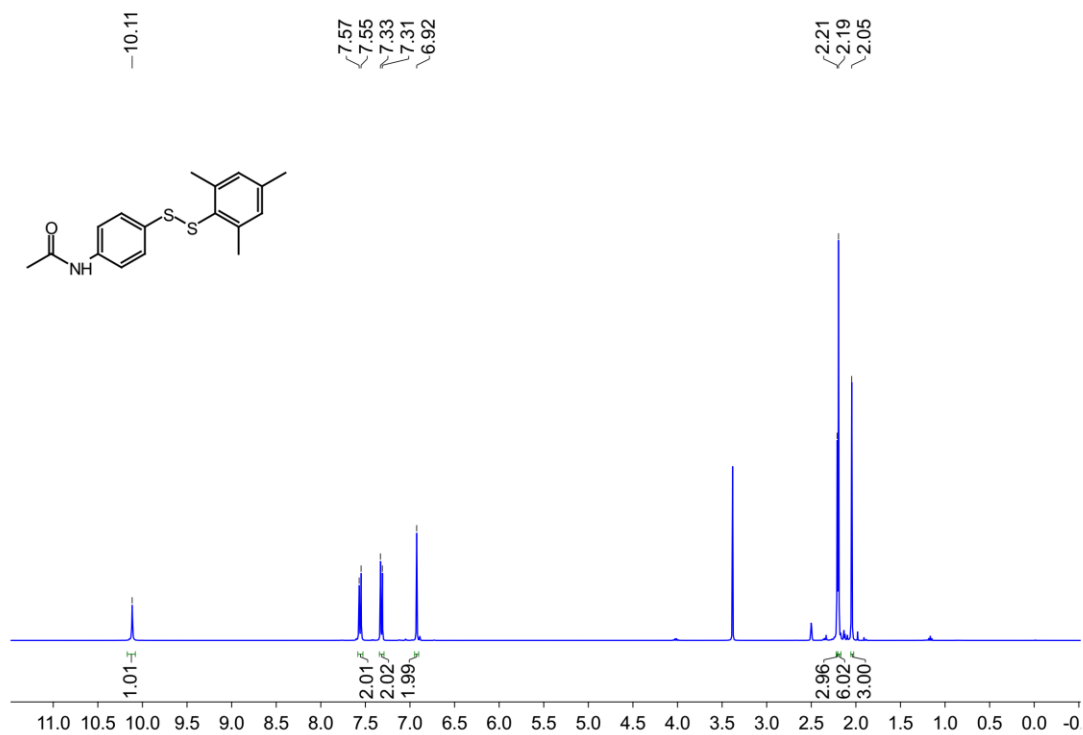

$^1\text{H}$  NMR spectrum of compound **4b**

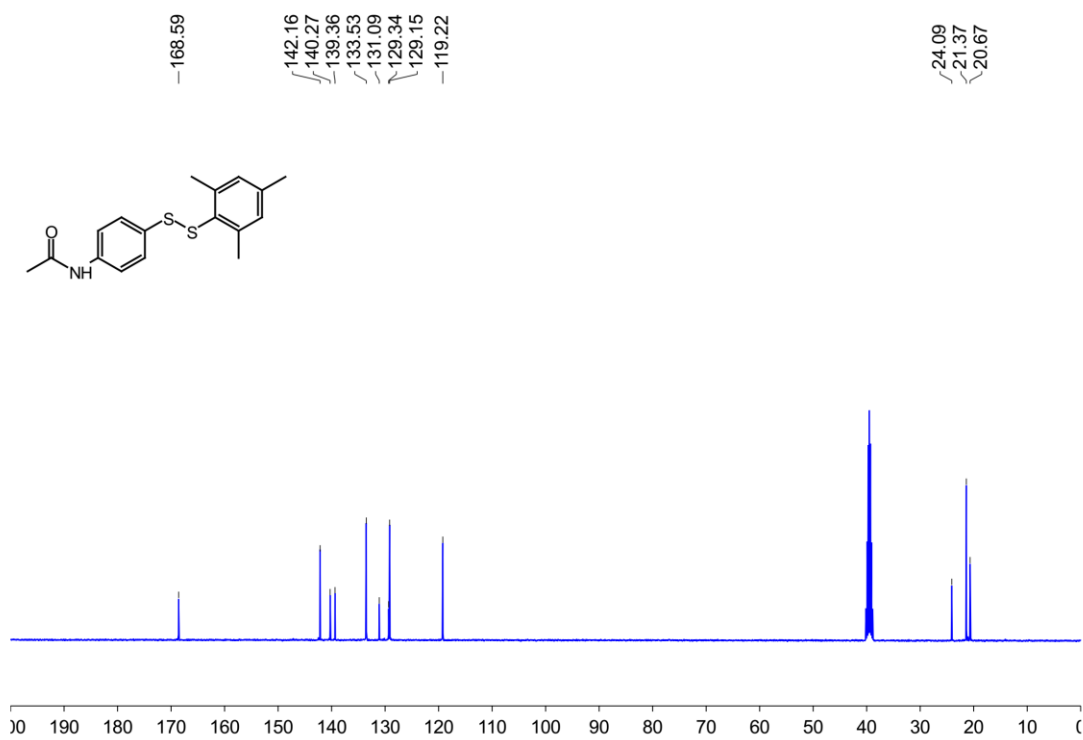

$^{13}\text{C}$  NMR spectrum of compound **4b**

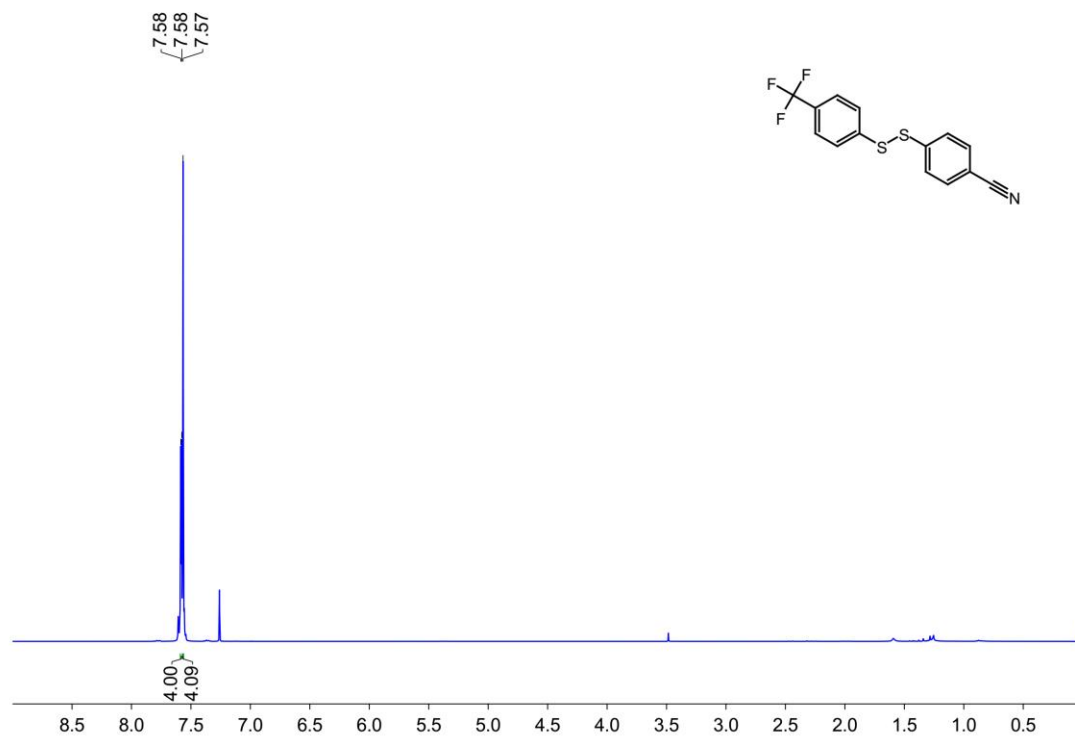

$^1\text{H}$  NMR spectrum of compound **4c**

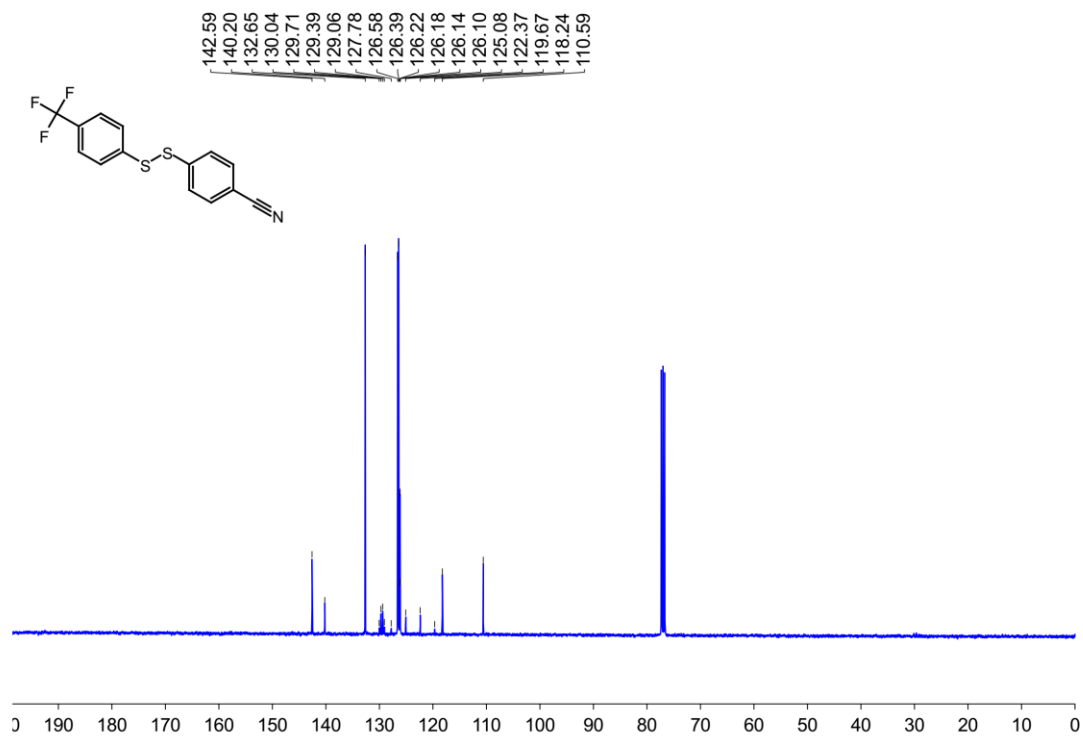

$^{13}\text{C}$  NMR spectrum of compound **4c**

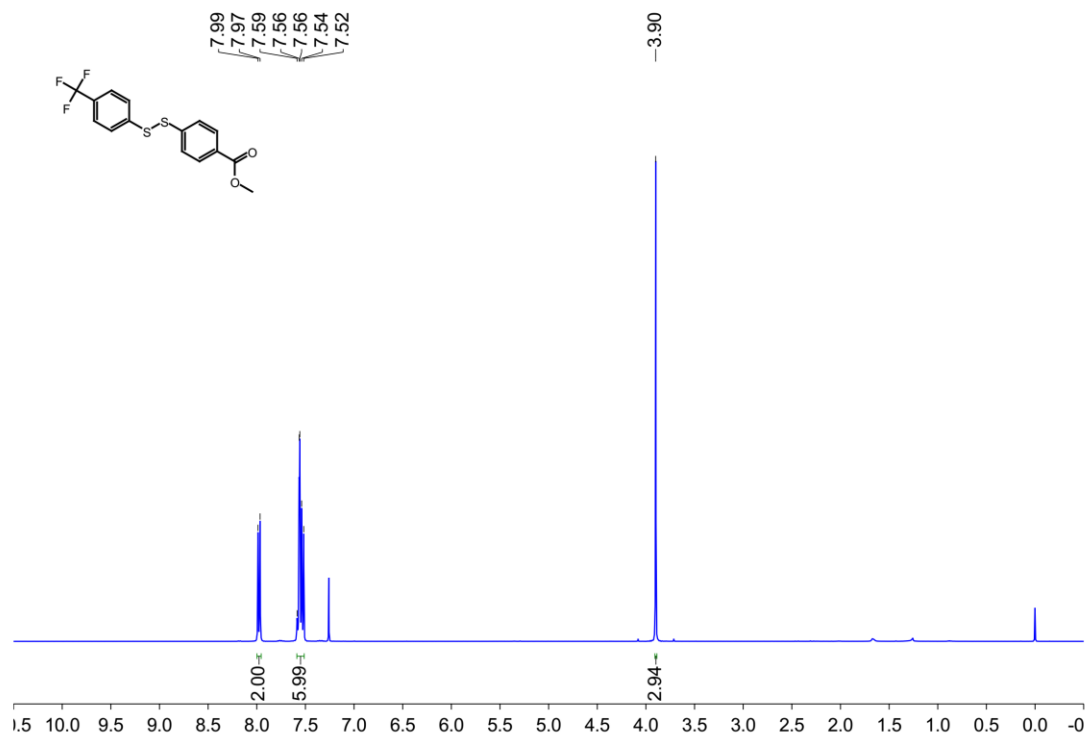

$^1\text{H}$  NMR spectrum of compound **4d**

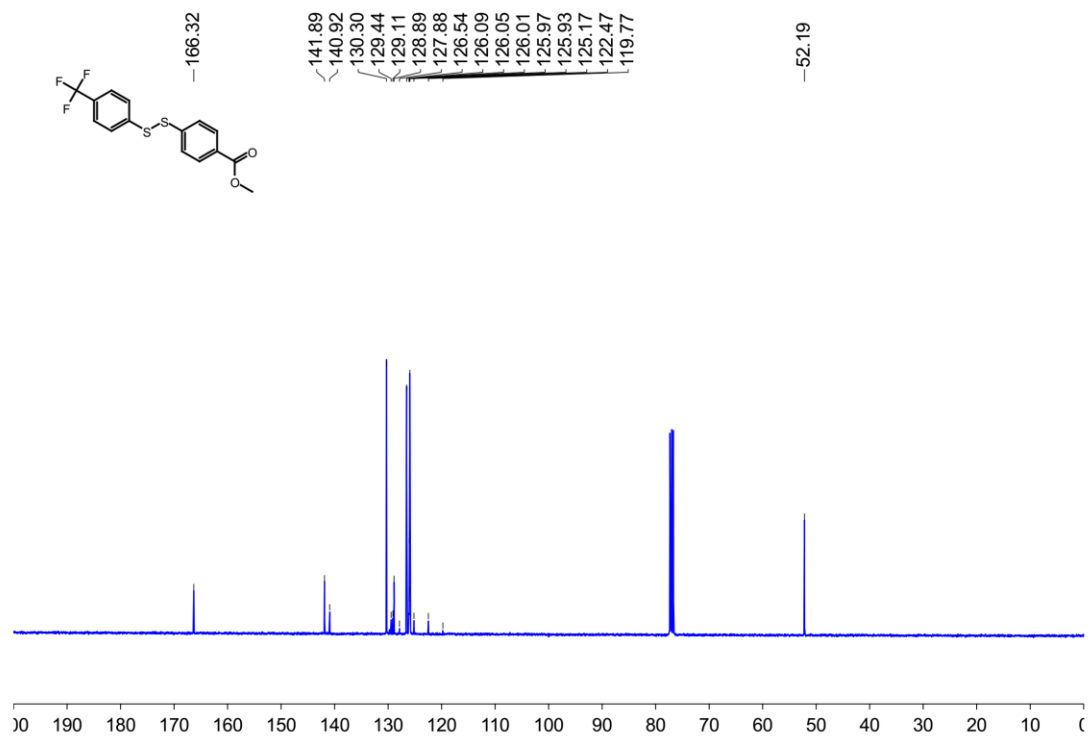

$^{13}\text{C}$  NMR spectrum of compound **4d**

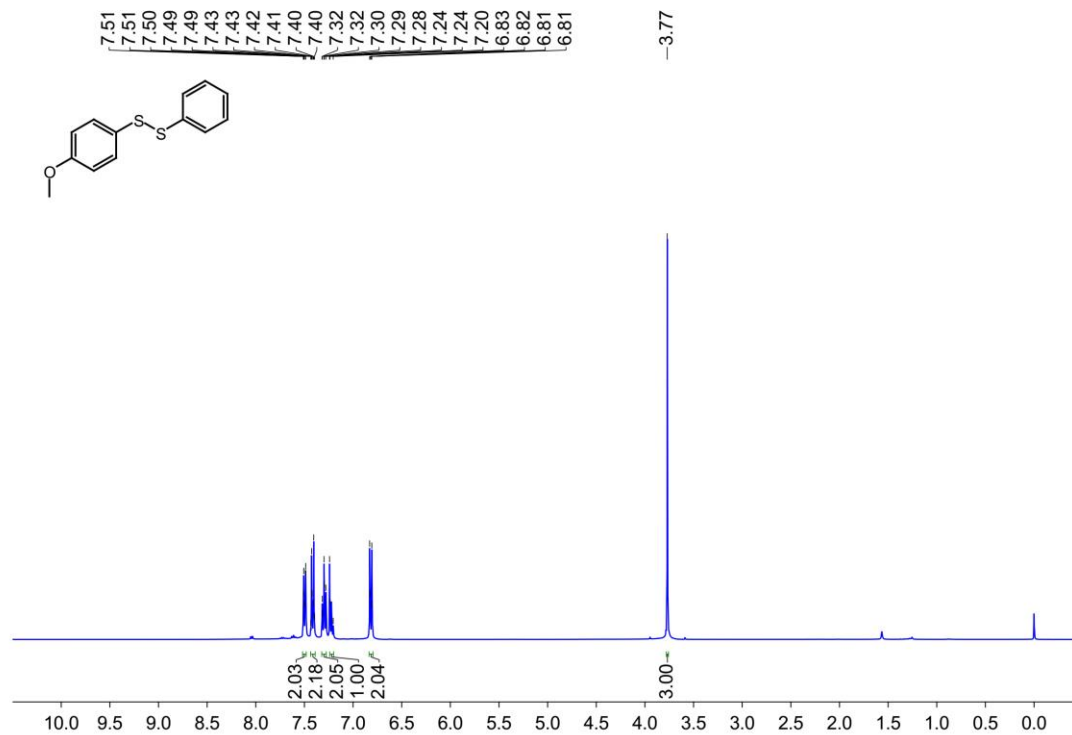

$^1\text{H}$  NMR spectrum of compound **4e**

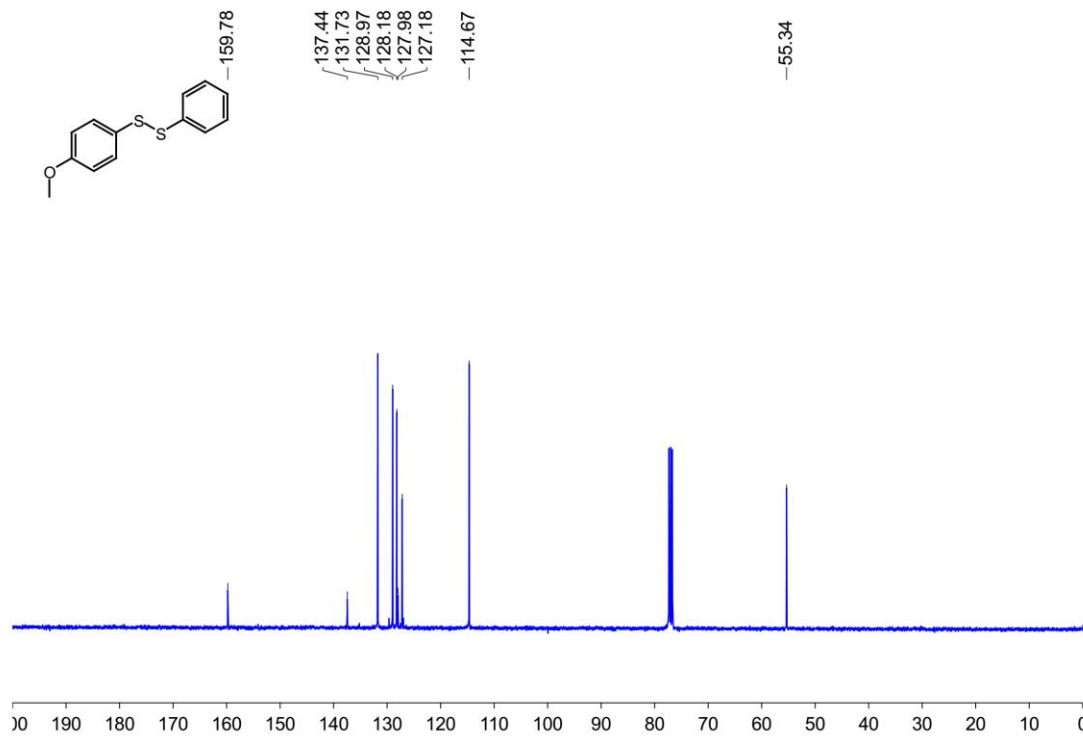

$^{13}\text{C}$  NMR spectrum of compound **4e**
